# Supplementary material for: Quantification of the actual composition of polymeric nanocapsules: a quality control analysis
Source: PubMed Central journal article supplement (PMC9512864; doi:10.1007/s13346-022-01150-5), 2022-03-18
Supplement: 13346_2022_1150_MOESM1_ESM.pdf [file 13346_2022_1150_MOESM1_ESM.pdf]

**SUPPORTING INFORMATION | Quantification of the actual composition of polymeric nanocapsules. A quality control analysis**

**Supplementary Table 1. Validation of the calibration curves for each quantified substance and formulation**

| Formulation                                                    | Molecule                                                       | RT (min) (mean) (n=3) | Calibration range (ppb) | curve        | r <sup>2</sup> (mean ± StD) (n=3) | Precision (pooled RStD%) (%) | Accuracy (RE%) (%) (low; mid; high range) | LoQ (ppb) (mean ± StD) (n=3) |
|----------------------------------------------------------------|----------------------------------------------------------------|-----------------------|-------------------------|--------------|-----------------------------------|------------------------------|-------------------------------------------|------------------------------|
| SD-/PEG-HA                                                     | Benzethonium chloride                                          | 2.6                   | 8.0 – 80.0              |              | 0.9959 ± 0.0016                   | 4.4                          | 3.9; -0.3; 2.4                            | 0.70 ± 0.38                  |
|                                                                | TPGS                                                           | 4.0                   | 64.0 – 640.0            |              | 0.9854 ± 0.0040                   | 8.6                          | 1.9; -1.0; 2.5                            | 1.90 ± 0.86                  |
|                                                                | DL- $\alpha$ -tocopherol                                       | 4.9                   | 216.0 – 2160.0          |              | 0.9948 ± 0.0040                   | 4.9                          | -1.6; 2.6; 0.0                            | 1.16 ± 0.47                  |
|                                                                | Hyaluronic acid (whole)                                        | 4.9                   | 19,590.0 – 68,570.0     |              | 0.9897 ± 0.0009                   | 4.0                          | 3.5; 1.0; 1.0                             | 22.51 ± 9.16                 |
|                                                                | Hyaluronic acid (supernatant)                                  | 4.9                   | 15,670.0 – 78,370.0     |              | 0.9889 ± 0.0039                   | 4.3                          | 5.3; 3.6; 3.6                             | 26.65 ± 6.62                 |
|                                                                | Hyaluronic acid (infranatant)                                  | 4.9                   | 17,140.0 – 58,780.0     |              | 0.9840 ± 0.0056                   | 4.8                          | 5.6; 1.7; 1.7                             | 34.42 ± 14.95                |
| SD-noPEG-HA                                                    | CTAB                                                           | 1.6                   | 43.2 – 144.0            |              | 0.9985 ± 0.0009                   | 1.0                          | 2.0; -0.2; 1.1                            | 0.27 ± 0.13                  |
|                                                                | C <sub>8</sub> -C <sub>8</sub> -C <sub>8</sub> Triglyceride    | 1.8                   | 881.3 – 2937.6 (*)      |              | 0.9880 ± 0.0016                   | 3.2                          | 5.9; -2.7; 3.4                            | 5.99 ± 2.76                  |
|                                                                | C <sub>8</sub> -C <sub>8</sub> -C <sub>10</sub> Triglyceride   | 1.9                   | 881.3 – 2937.6 (*)      |              | 0.9859 ± 0.0040                   | 3.0                          | 6.1; -2.0; 4.3                            | 8.22 ± 2.40                  |
|                                                                | C <sub>8</sub> -C <sub>10</sub> -C <sub>10</sub> Triglyceride  | 2.0                   | 881.3 – 2937.6 (*)      |              | 0.9852 ± 0.0031                   | 3.7                          | 5.6; -3.5; 3.7                            | 8.18 ± 1.66                  |
|                                                                | C <sub>10</sub> -C <sub>10</sub> -C <sub>10</sub> Triglyceride | 2.0                   | 881.3 – 2937.6 (*)      |              | 0.9792 ± 0.0036                   | 5.0                          | 4.2; -2.7; 3.1                            | 1.63 ± 0.31                  |
|                                                                | Phosphatidylcholine 756.6 Da                                   | 2.0                   | 216.0 – 720.0 (**)      |              | 0.9887 ± 0.0074                   | 1.6                          | 2.8; 5.4; -4.7                            | 0.62 ± 0.44                  |
|                                                                | Phosphatidylcholine 758.6 Da                                   | 2.0                   | 216.0 – 720.0 (**)      |              | 0.9812 ± 0.0018                   | 3.4                          | 4.2; 5.3; -4.1                            | 0.14 ± 0.01                  |
|                                                                | Phosphatidylcholine 780.6 Da                                   | 2.0                   | 216.0 – 720.0 (**)      |              | 0.9908 ± 0.0052                   | 1.2                          | 1.8; 4.8; -4.2                            | 0.24 ± 0.19                  |
|                                                                | Phosphatidylcholine 782.5 Da                                   | 2.1                   | 216.0 – 720.0 (**)      |              | 0.9880 ± 0.0086                   | 1.2                          | 2.6; 6.1; -4.9                            | 0.06 ± 0.01                  |
|                                                                | Hyaluronic acid (whole)                                        | 4.9                   | 6,120.0 – 10,200.0      |              | 0.9383 ± 0.0652                   | 4.0                          | 3.7; 1.3; 1.3                             | 19.18 ± 2.49                 |
|                                                                | Hyaluronic acid (supernatant)                                  | 4.9                   | 20,000.0 – 98,000.0     |              | 0.9876 ± 0.0039                   | 4.8                          | 8.1; 6.0; 6.0                             | 32.28 ± 9.41                 |
|                                                                | Hyaluronic acid (infranatant)                                  | 4.9                   | 10,000.0 – 29,000.0     |              | 0.9852 ± 0.0052                   | 4.3                          | 1.8; 2.4; 2.4                             | 15.35 ± 1.82                 |
|                                                                | SD-noPEG-PSA                                                   | CTAB                  | 1.6                     | 43.2 – 144.0 |                                   | 0.9952 ± 0.0015              | 1.5                                       | 3.7; -0.2; 0.5               |
| C <sub>8</sub> -C <sub>8</sub> -C <sub>8</sub> Triglyceride    |                                                                | 1.8                   | 881.3 – 2937.6 (*)      |              | 0.9814 ± 0.0025                   | 3.3                          | 8.5; -1.6; 2.5                            | 6.46 ± 1.65                  |
| C <sub>8</sub> -C <sub>8</sub> -C <sub>10</sub> Triglyceride   |                                                                | 1.9                   | 881.3 – 2937.6 (*)      |              | 0.9801 ± 0.0017                   | 3.8                          | 8.4; -2.1; 2.8                            | 9.44 ± 2.86                  |
| C <sub>8</sub> -C <sub>10</sub> -C <sub>10</sub> Triglyceride  |                                                                | 2.0                   | 881.3 – 2937.6 (*)      |              | 0.9848 ± 0.0008                   | 4.0                          | 5.2; -0.8; 2.3                            | 7.59 ± 1.38                  |
| C <sub>10</sub> -C <sub>10</sub> -C <sub>10</sub> Triglyceride |                                                                | 2.0                   | 881.3 – 2937.6 (*)      |              | 0.9697 ± 0.0165                   | 5.9                          | 4.6; -2.8; 3.1                            | 1.08 ± 0.05                  |
| Phosphatidylcholine 756.6 Da                                   |                                                                | 2.0                   | 216.0 – 720.0 (**)      |              | 0.9611 ± 0.0100                   | 2.9                          | 7.8; 4.7; -11.6                           | 0.91 ± 0.14                  |
| Phosphatidylcholine 758.6 Da                                   |                                                                | 2.0                   | 216.0 – 720.0 (**)      |              | 0.9552 ± 0.0114                   | 4.7                          | 8.1; 3.2; -11.9                           | 0.15 ± 0.02                  |
| Phosphatidylcholine 780.6 Da                                   |                                                                | 2.0                   | 216.0 – 720.0 (**)      |              | 0.9720 ± 0.0092                   | 1.7                          | 7.1; 4.8; -9.1                            | 0.31 ± 0.14                  |
| Phosphatidylcholine 782.5 Da                                   |                                                                | 2.1                   | 216.0 – 720.0 (**)      |              | 0.9628 ± 0.0116                   | 2.2                          | 8.0; 4.8; -11.8                           | 0.08 ± 0.01                  |
| Polysialic acid (whole)                                        |                                                                | 5.1                   | 6,150.0 – 10,870.0      |              | 0.9788 ± 0.0115                   | 1.4                          | 2.4; 0.7; 0.7                             | 86.30 ± 32.47                |
| Polysialic acid (supernatant)                                  |                                                                | 5.1                   | 4,900.0 – 81,630.0      |              | 0.9867 ± 0.0061                   | 2.8                          | 3.6; 12.8; 12.8                           | 413.54 ± 424.46              |
| Polysialic acid (infranatant)                                  |                                                                | 5.1                   | 7,350.0 – 29,390.0      |              | 0.9929 ± 0.0054                   | 1.7                          | 3.6; 3.6; 3.6                             | 245.55 ± 134.63              |

**SUPPORTING INFORMATION | Quantification of the actual composition of polymeric nanocapsules. A quality control analysis**

**Supplementary Table 1. Validation of the calibration curves for each quantified substance and formulation (continuation)**

| Formulation          | Molecule                                                       | RT (min) (mean) (n=3) | Calibration range (ppb) | curve | r <sup>2</sup> (mean ± StD) (n=3) | Precision (pooled RStD%) (%) | Accuracy (RE%) (%) (low; mid; high range) | LoQ (ppb) (mean ± StD) (n=3) |
|----------------------|----------------------------------------------------------------|-----------------------|-------------------------|-------|-----------------------------------|------------------------------|-------------------------------------------|------------------------------|
| SE- <i>b</i> -PEG-HA | Benzethonium chloride                                          | 2.5                   | 1.0 – 9.6               |       | 0.9997 ± 0.0002                   | 1.1                          | 0.5; -4.7; 0.1                            | 0.24 ± 0.03                  |
|                      | Macrogol-15-hydroxystearate                                    | 3.2                   | 6.0 – 120.0 (***)       |       | 0.9992 ± 0.0001                   | 2.0                          | -1.8; -0.6; -1.5                          | 2.25 ± 1.74                  |
|                      | Polysorbate 80                                                 | 4.4                   | 487.2 – 2784.0          |       | 0.9990 ± 0.0002                   | 0.8                          | 3.9; -1.6; 1.4                            | 11.61 ± 0.36                 |
|                      | C <sub>8</sub> -C <sub>8</sub> -C <sub>8</sub> Triglyceride    | 8.3                   | 849.6 – 2832.0 (*)      |       | 0.9939 ± 0.0028                   | 2.5                          | 3.0; -2.1; 1.1                            | 3.32 ± 1.59                  |
|                      | C <sub>8</sub> -C <sub>8</sub> -C <sub>10</sub> Triglyceride   | 8.7                   | 849.6 – 2832.0 (*)      |       | 0.9895 ± 0.0027                   | 3.8                          | 3.9; -1.5; 1.0                            | 2.51 ± 1.14                  |
|                      | C <sub>8</sub> -C <sub>10</sub> -C <sub>10</sub> Triglyceride  | 8.9                   | 849.6 – 2832.0 (*)      |       | 0.9895 ± 0.0030                   | 3.7                          | 4.8; 4.7; 0.7                             | 2.15 ± 1.82                  |
|                      | C <sub>10</sub> -C <sub>10</sub> -C <sub>10</sub> Triglyceride | 9.0                   | 849.6 – 2832.0 (*)      |       | 0.9889 ± 0.0046                   | 3.6                          | 2.5; -4.4; 2.1                            | 1.88 ± 1.17                  |
|                      | Hyaluronic acid (whole)                                        | 4.9                   | 6,730.0 – 17,140.0      |       | 0.9863 ± 0.0004                   | 2.4                          | 3.2; 1.7; 1.7                             | 15.53 ± 6.42                 |
|                      | Hyaluronic acid (retentate)                                    | 4.9                   | 2,450.0 – 9,180.0       |       | 0.9658 ± 0.0164                   | 3.3                          | 8.7; 8.4; 8.4                             | 14.21 ± 5.29                 |
|                      | Hyaluronic acid (permeate)                                     | 4.9                   | 7,000.0 – 28,000.0      |       | 0.9901 ± 0.0049                   | 3.9                          | 4.0; 1.1; 1.1                             | 35.22 ± 3.82                 |
| SD-noPEG-PEG-PGA     | DL- $\alpha$ -tocopherol                                       | 2.9                   | 288.8 – 2,887.5         |       | 0.9958 ± 0.0009                   | 2.5                          | -7.5; 2.8; -3.5                           | 6.33 ± 0.58                  |
|                      | 1,2-dioleoyl-3-trimethylammoniumpropane chloride               | 3.6                   | 7.5 – 75.0              |       | 0.9984 ± 0.0010                   | 1.7                          | -2.5; -0.3; -0.8                          | 1.26 ± 0.49                  |
|                      | PEG-PGA (whole)                                                | 9.8                   | 23,700 – 132,200        |       | 0.9978 ± 0.0012                   | 1.1                          | 3.8; 1.0; 1.0                             | 432.10 ± 360.61              |
|                      | PEG-PGA (supernatant)                                          | 9.8                   | 7,700 – 184,800         |       | 0.9976 ± 0.0017                   | 1.3                          | 2.8; 4.6; 4.6                             | 666.06 ± 970.38              |
|                      | PEG-PGA (infranatant)                                          | 9.8                   | 4,800 – 113,300         |       | 0.9984 ± 0.0012                   | 1.9                          | 2.5; 1.1; 1.1                             | 69.37 ± 39.55                |

SD-*l*-PEG-HA: lineal-polyethylene glycol-containing hyaluronic acid nanocapsules formulated by solvent displacement. SD-noPEG-HA: non-PEGylated hyaluronic acid nanocapsules formulated by solvent displacement. SD-noPEG-PSA: non-PEGylated polysialic acid nanocapsules formulated by solvent displacement. SE-*b*-PEG-HA: Self-emulsifying branched-polyethylene glycol-containing hyaluronic acid nanocapsules. SD-noPEG-PEG-PGA: Solvent displacement nanocapsules not containing PEGylated surfactants and with an outer shell of polyethylene glycol polyglutamic acid. StD: standard deviation. RT: retention time. RStD%: Relative standard deviation of the responses for each concentration level. RE%: relative differences between the estimated concentrations and the actual standard concentration. LoQ: limit of quantification. TPGS: D- $\alpha$ -tocopherol polyethylene glycol 1000 succinate. CTAB: Hexadecyltrimethylammonium bromide. (\*): C<sub>8</sub>-C<sub>8</sub>-C<sub>8</sub>, C<sub>8</sub>-C<sub>8</sub>-C<sub>10</sub>, C<sub>8</sub>-C<sub>10</sub>-C<sub>10</sub>, and C<sub>10</sub>-C<sub>10</sub>-C<sub>10</sub> triglycerides calibration curves were built based on the amount of Miglyol® 812N. (\*\*): Phosphatidylcholines' calibration curves were built based on the amount of Epikuron™ 145V. (\*\*\*): macrogol-15-hydroxystearate calibration curves were built based on the amount of Kolliphor® HS15.

Supplementary Table 2. Chromatographic method for the analysis of non-polymeric substances

| Formulation                     | Time (min) | A (%) | B (%) | C (%) | D (%) |
|---------------------------------|------------|-------|-------|-------|-------|
| SD- <i>l</i> -PEG-HA            | 0.00       | 70    | 30    | 0     | 0     |
|                                 | 1.00       | 70    | 30    | 0     | 0     |
|                                 | 1.10       | 0     | 100   | 0     | 0     |
|                                 | 6.90       | 0     | 100   | 0     | 0     |
|                                 | 7.00       | 0     | 0     | 100   | 0     |
|                                 | 10.40      | 0     | 0     | 100   | 0     |
|                                 | 10.50      | 70    | 30    | 0     | 0     |
|                                 | 12.00      | 70    | 30    | 0     | 0     |
| SD-noPEG-HA and<br>SD-noPEG-PSA | 0.00       | 90    | 10    | 0     | 0     |
|                                 | 0.10       | 90    | 10    | 0     | 0     |
|                                 | 0.11       | 0     | 40    | 0     | 60    |
|                                 | 2.90       | 0     | 40    | 0     | 60    |
|                                 | 2.95       | 0     | 0     | 100   | 0     |
|                                 | 4.00       | 0     | 0     | 100   | 0     |
|                                 | 4.05       | 90    | 10    | 0     | 0     |
|                                 | 5.00       | 90    | 10    | 0     | 0     |
| SE- <i>b</i> -PEG-HA            | 0.00       | 70    | 30    | 0     | 0     |
|                                 | 0.20       | 70    | 30    | 0     | 0     |
|                                 | 0.30       | 40    | 60    | 0     | 0     |
|                                 | 5.30       | 24    | 76    | 0     | 0     |
|                                 | 6.80       | 0     | 100   | 0     | 0     |
|                                 | 8.50       | 0     | 30    | 0     | 70    |
|                                 | 9.50       | 0     | 30    | 0     | 70    |
|                                 | 9.60       | 0     | 0     | 100   | 0     |
|                                 | 14.00      | 0     | 0     | 100   | 0     |
|                                 | 14.10      | 70    | 30    | 0     | 0     |
| 16.00                           | 70         | 30    | 0     | 0     |       |
| SD-noPEG-<br>PEG-PGA            | 0.00       | 70    | 30    | 0     | 0     |
|                                 | 1.00       | 70    | 30    | 0     | 0     |
|                                 | 1.10       | 0     | 50    | 0     | 50    |
|                                 | 3.00       | 0     | 50    | 0     | 50    |
|                                 | 3.10       | 0     | 0     | 100   | 0     |
|                                 | 4.50       | 0     | 0     | 100   | 0     |
|                                 | 4.60       | 70    | 30    | 0     | 0     |
|                                 | 6.00       | 70    | 30    | 0     | 0     |

A: 50 mM formic acid and 2 mM ammonium formate in water. B: 95 % acetonitrile and 5 % 2 mM ammonium formate aqueous solution (v/v) 50 mM formic acid. C: water. D: isopropyl alcohol. SD-*l*-PEG-HA: lineal-polyethylene glycol-containing hyaluronic acid nanocapsules formulated by solvent displacement. SD-noPEG-HA: non-PEGylated hyaluronic acid nanocapsules formulated by solvent displacement. SD-noPEG-PSA: non-PEGylated polysialic acid nanocapsules formulated by solvent displacement. SE-*b*-PEG-HA: Self-emulsifying branched-polyethylene glycol-containing hyaluronic acid nanocapsules.

**Supplementary Table 3. Chromatographic method for the analysis of digested hyaluronic and polysialic acids**

| Time (min) | %A | %B |
|------------|----|----|
| 0.00       | 98 | 2  |
| 2.00       | 98 | 2  |
| 3.00       | 60 | 40 |
| 4.00       | 60 | 40 |
| 4.10       | 20 | 80 |
| 8.00       | 20 | 80 |
| 9.00       | 98 | 2  |
| 13.00      | 98 | 2  |

A: 50 mM formic acid and 2 mM ammonium formate in water, and B. methanol. The flow was diverted to waste from minute 0.00 to 3.90 to avoid the non-volatile salt Na<sub>2</sub>SO<sub>4</sub> from entering the detector.

**Supplementary Table 4. Chromatographic method for the analysis of digested PEG-PGA**

| Time (min) | %A   | %B   |
|------------|------|------|
| 0.00       | 0    | 100  |
| 6.00       | 0    | 100  |
| 6.10       | 5.9  | 94.1 |
| 10.00      | 17.6 | 82.4 |
| 12.00      | 29.4 | 70.6 |
| 12.10      | 0    | 100  |
| 15.50      | 0    | 100  |

A: 75 mM formic acid and 5 mM ammonium formate in water, and B: 75 mM formic acid and 5 mM ammonium formate in acetonitrile (90 %) and water (10 %) mixture (v/v). The flow was diverted to waste from minute 0.00 to 9.00 to avoid the non-volatile salt Na<sub>2</sub>SO<sub>4</sub> from entering the detector.

Supplementary Table 5. Chromatograms of all the chromatographic methods and quantified molecules

| Chromatographic method                                              | Chromatogram                                                                                                                                                                               |
|---------------------------------------------------------------------|--------------------------------------------------------------------------------------------------------------------------------------------------------------------------------------------|
| SD- <i>I</i> -PEG-HA (Benzethonium; DL- $\alpha$ -tocopherol; TPGS) | 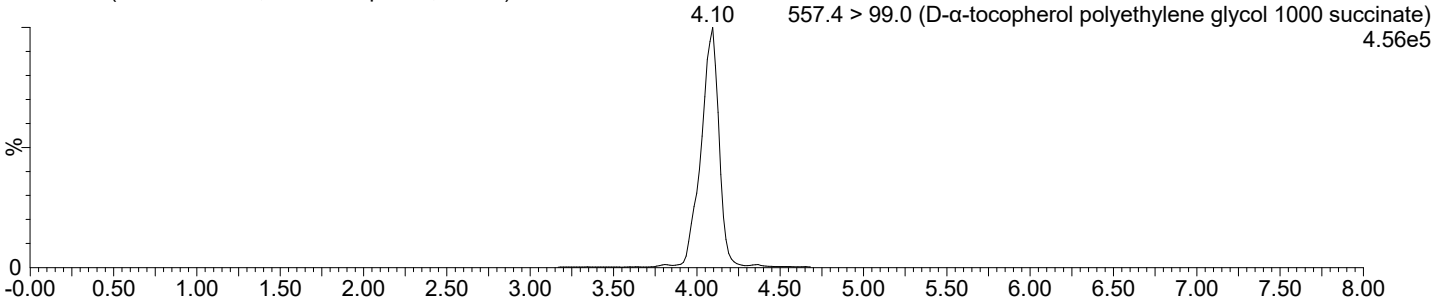 <p>557.4 &gt; 99.0 (D-<math>\alpha</math>-tocopherol polyethylene glycol 1000 succinate)<br/>4.56e5</p> |
| Hydrophobic substances of SD- <i>I</i> -PEG-HA                      |  <p>431.4 &gt; 165.0 (DL-<math>\alpha</math>-tocopherol)<br/>5.29e6</p>                                  |
|                                                                     |  <p>412.3 &gt; 91.0 (Benzethonium)<br/>2.52e7</p>                                                       |

Supplementary Table 5. Chromatograms of all the chromatographic methods and quantified molecules (continuation)

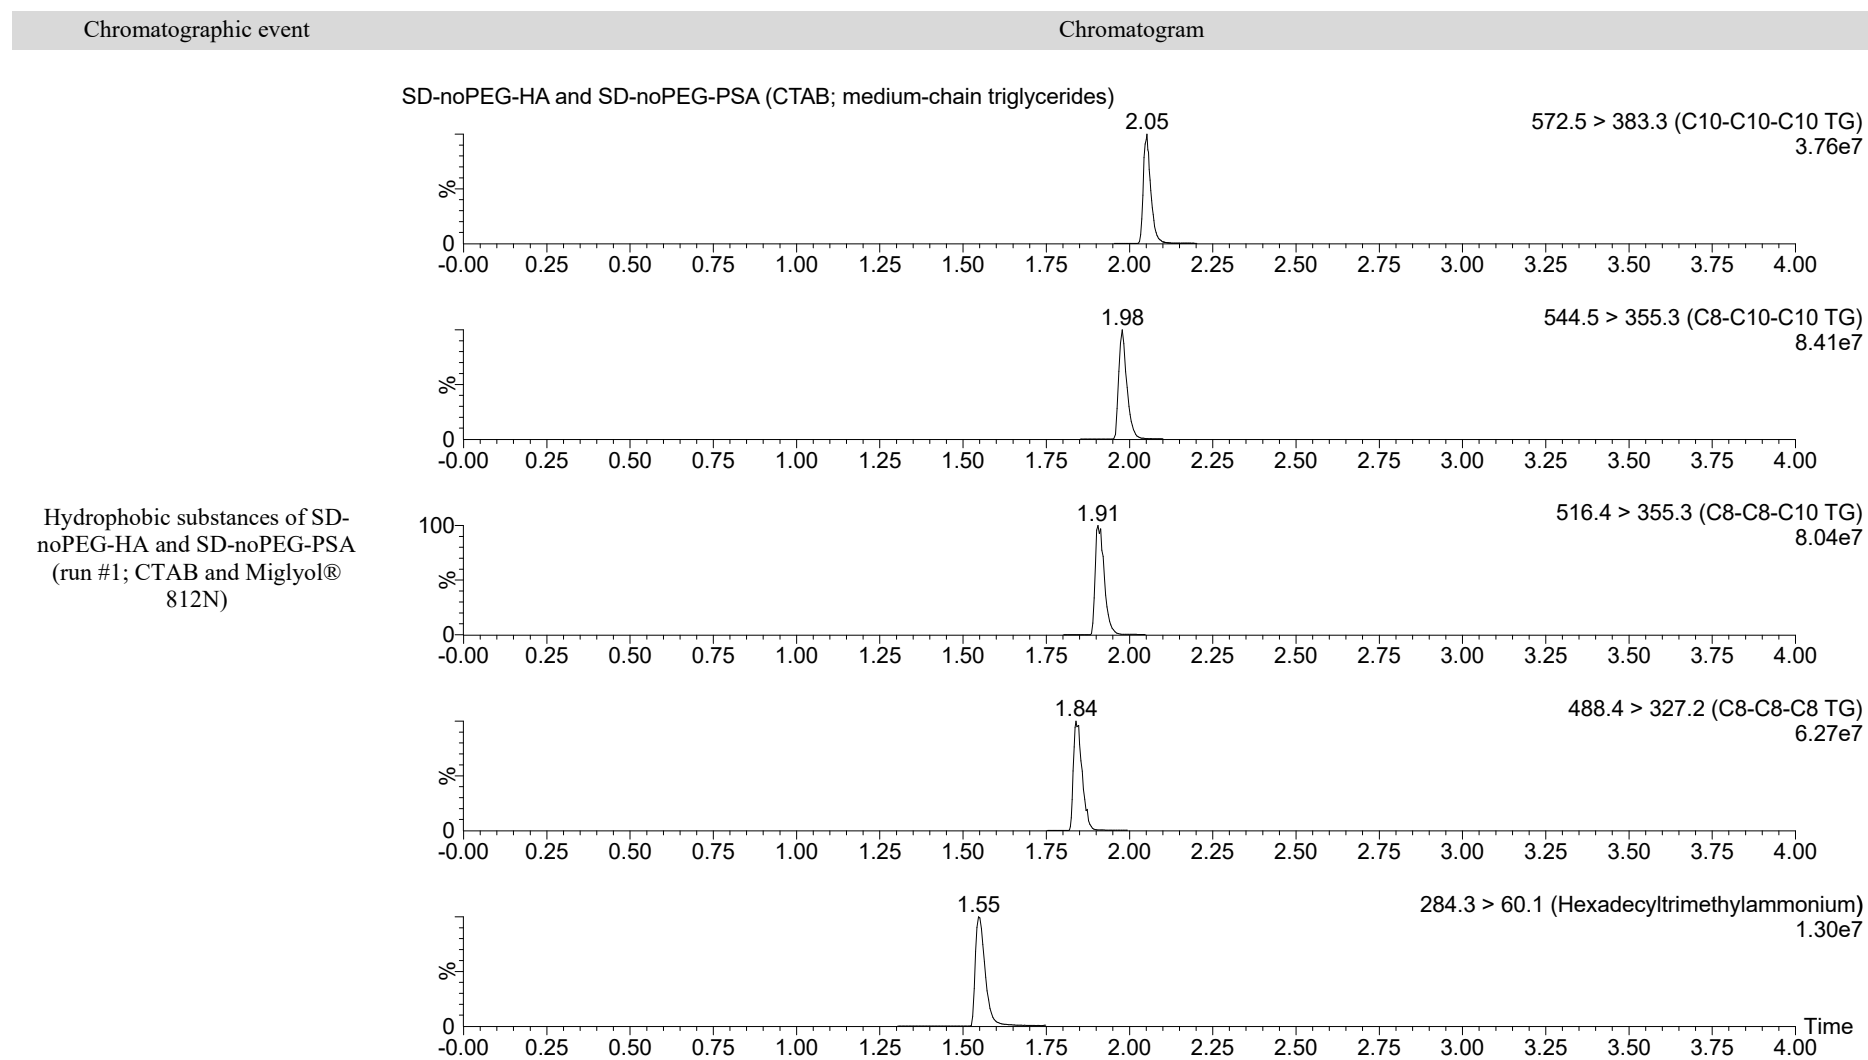

Supplementary Table 5. Chromatograms of all the chromatographic methods and quantified molecules (continuation)

| Chromatographic event                                                                | Chromatogram                                                                                                                          |
|--------------------------------------------------------------------------------------|---------------------------------------------------------------------------------------------------------------------------------------|
| SD-noPEG-HA and SD-noPEG-PSA (Phosphatidylcholine)                                   | 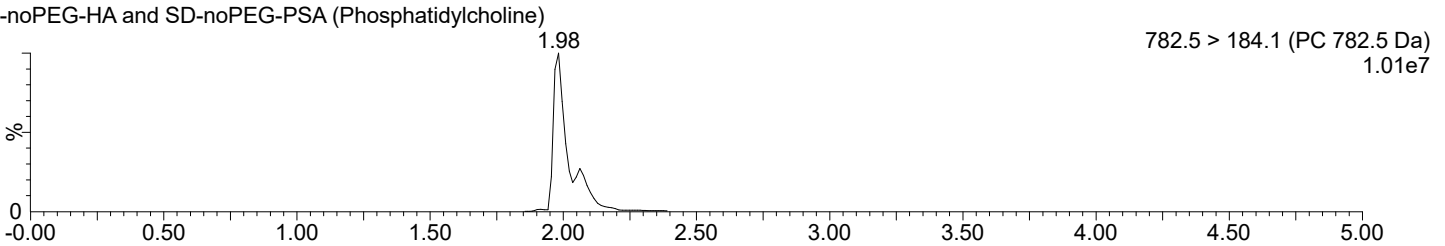 <p>782.5 &gt; 184.1 (PC 782.5 Da)<br/>1.01e7</p>   |
| Hydrophobic substances of SD-noPEG-HA and SD-noPEG-PSA (run #2; Phosphatidylcholine) |  <p>780.6 &gt; 184.1 (PC 780.6 Da)<br/>9.33e6</p>   |
|                                                                                      |  <p>758.6 &gt; 184.1 (PC 758.6 Da)<br/>3.85e6</p>  |
|                                                                                      |  <p>756.6 &gt; 184.1 (PC 756.6 Da)<br/>3.56e6</p> |

Supplementary Table 5. Chromatograms of all the chromatographic methods and quantified molecules (continuation)

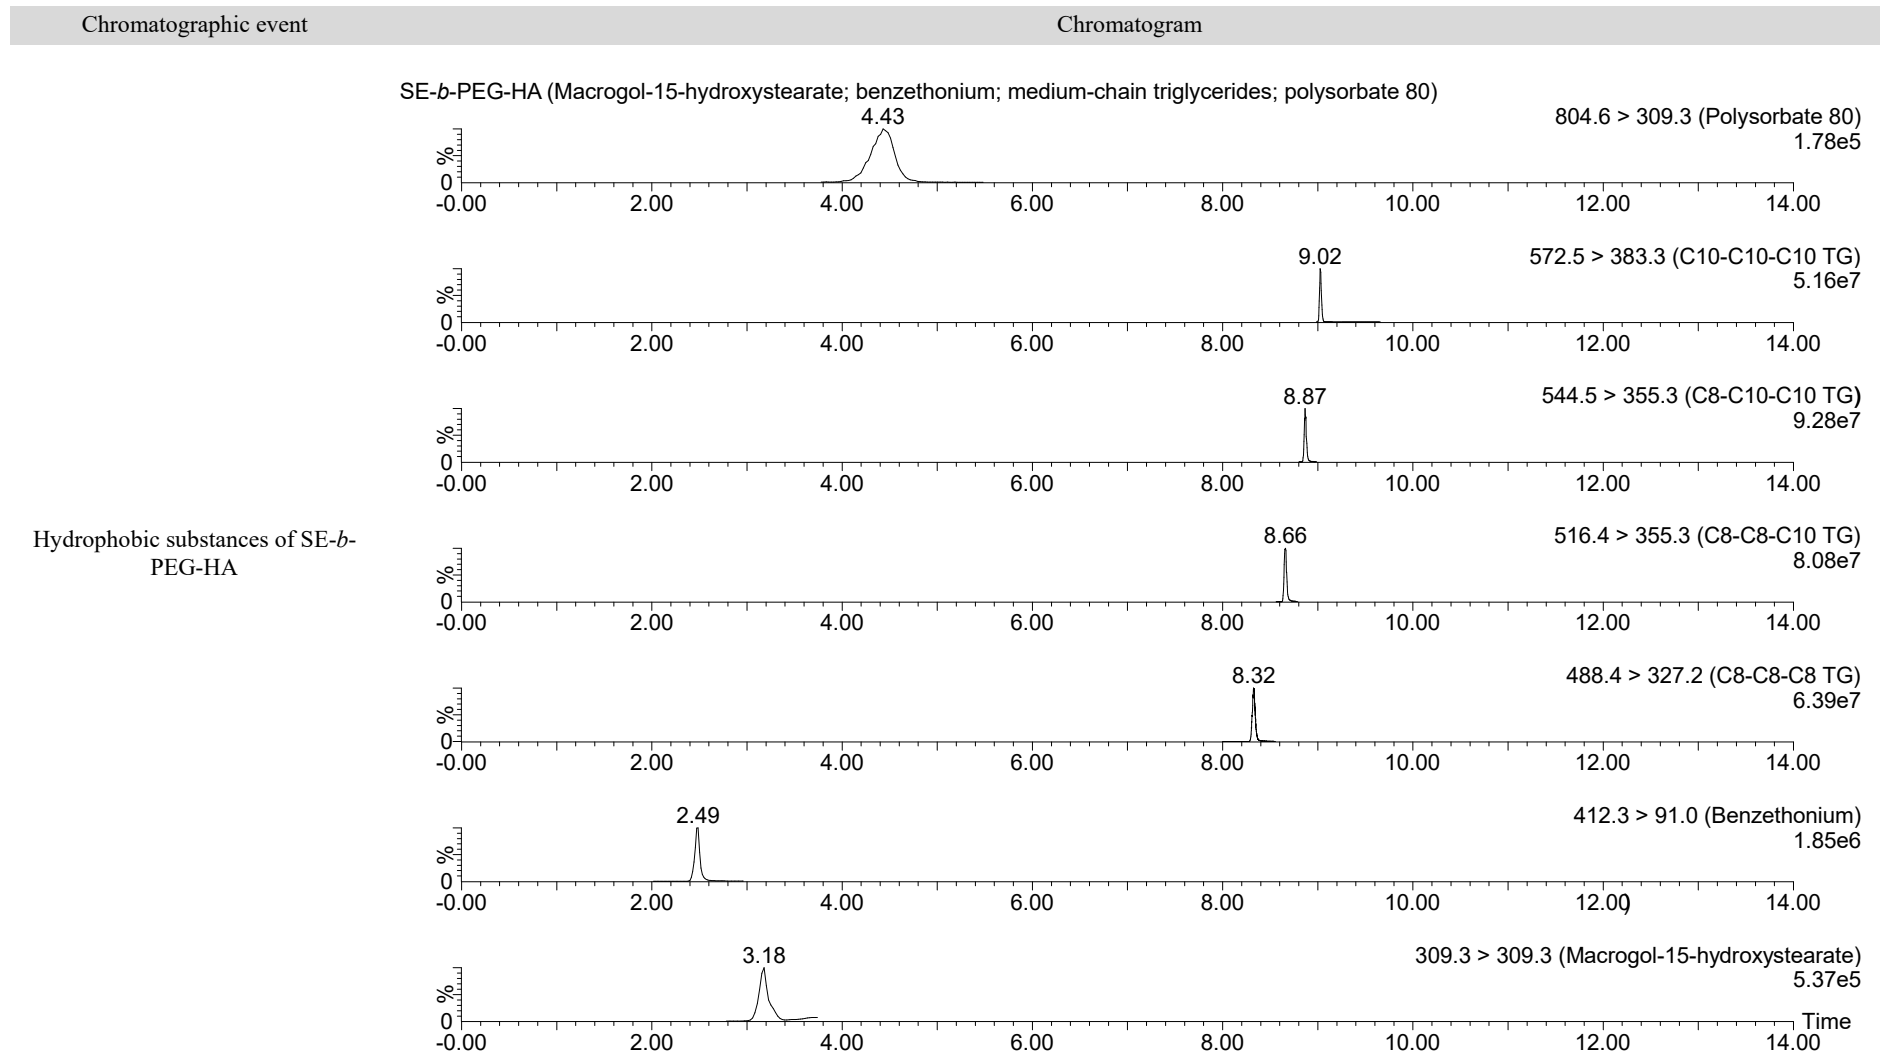



Supplementary Table 5. Chromatograms of all the chromatographic methods and quantified molecules (continuation)

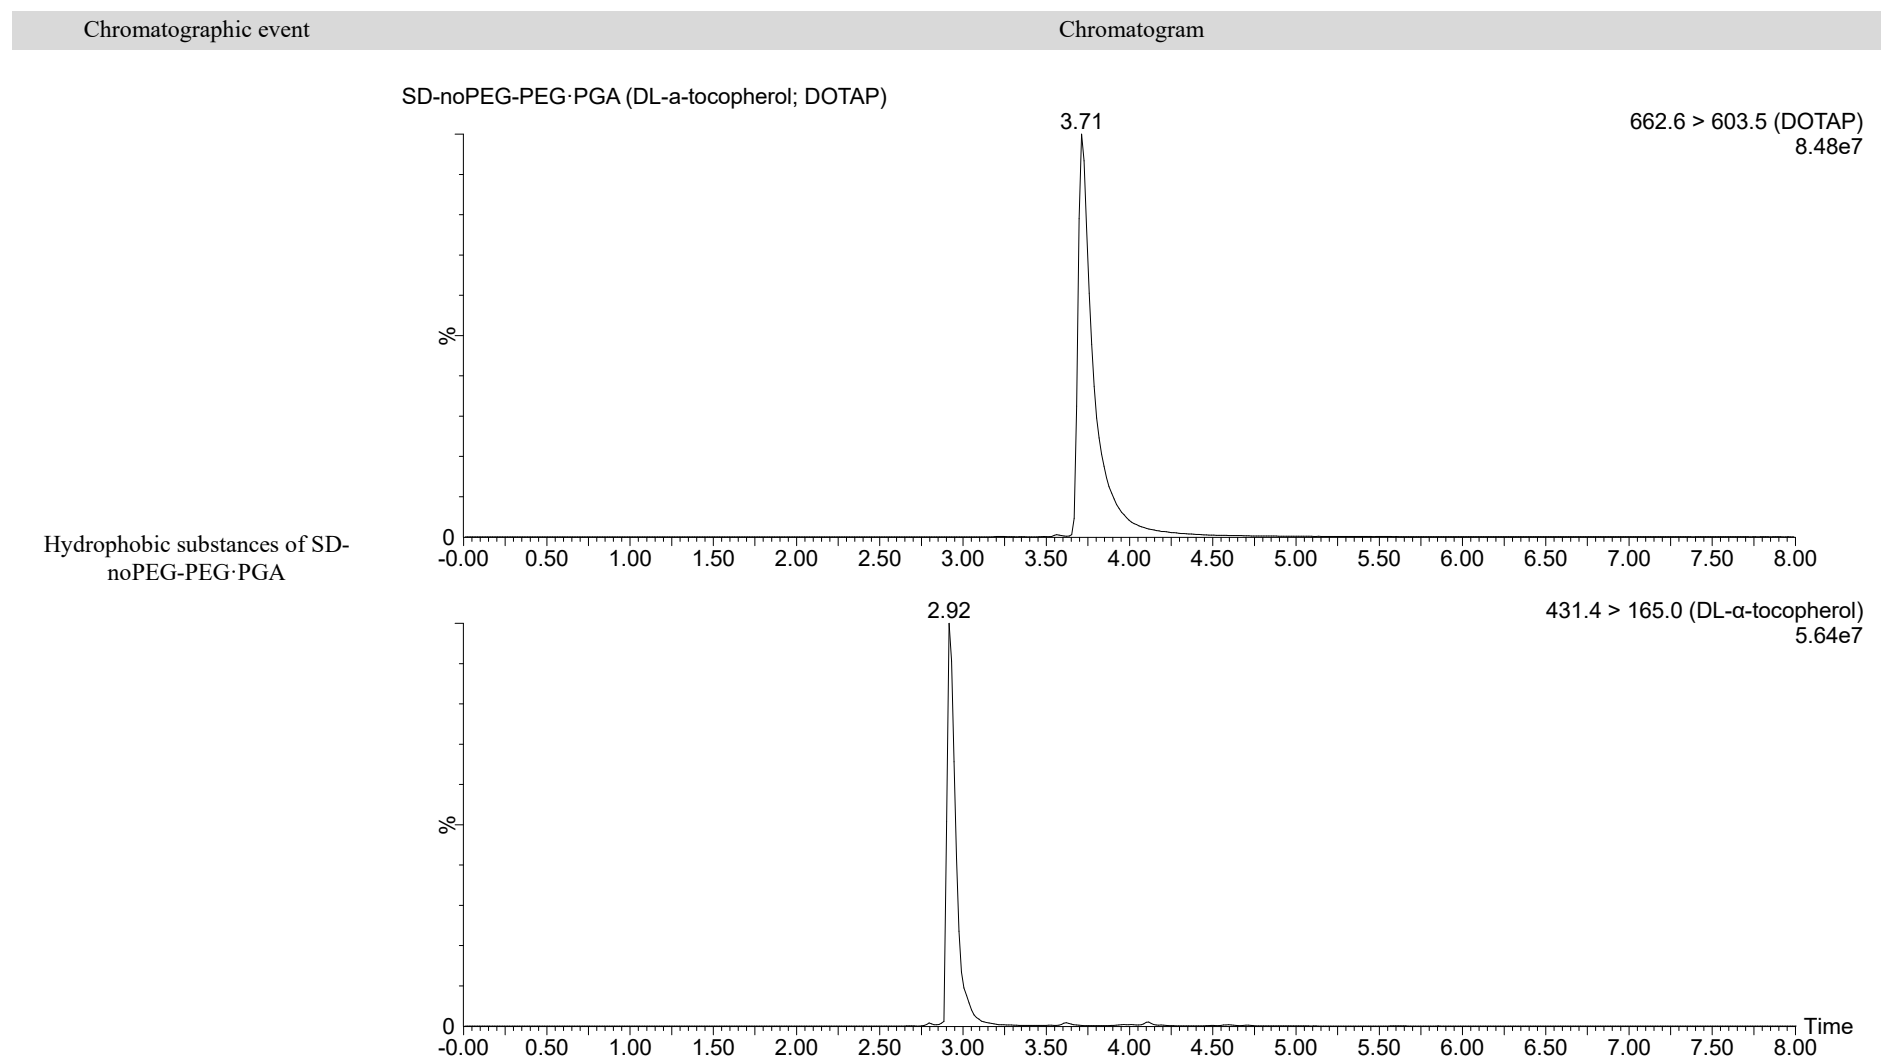

Supplementary Table 5. Chromatograms of all the chromatographic methods and quantified molecules (continuation)

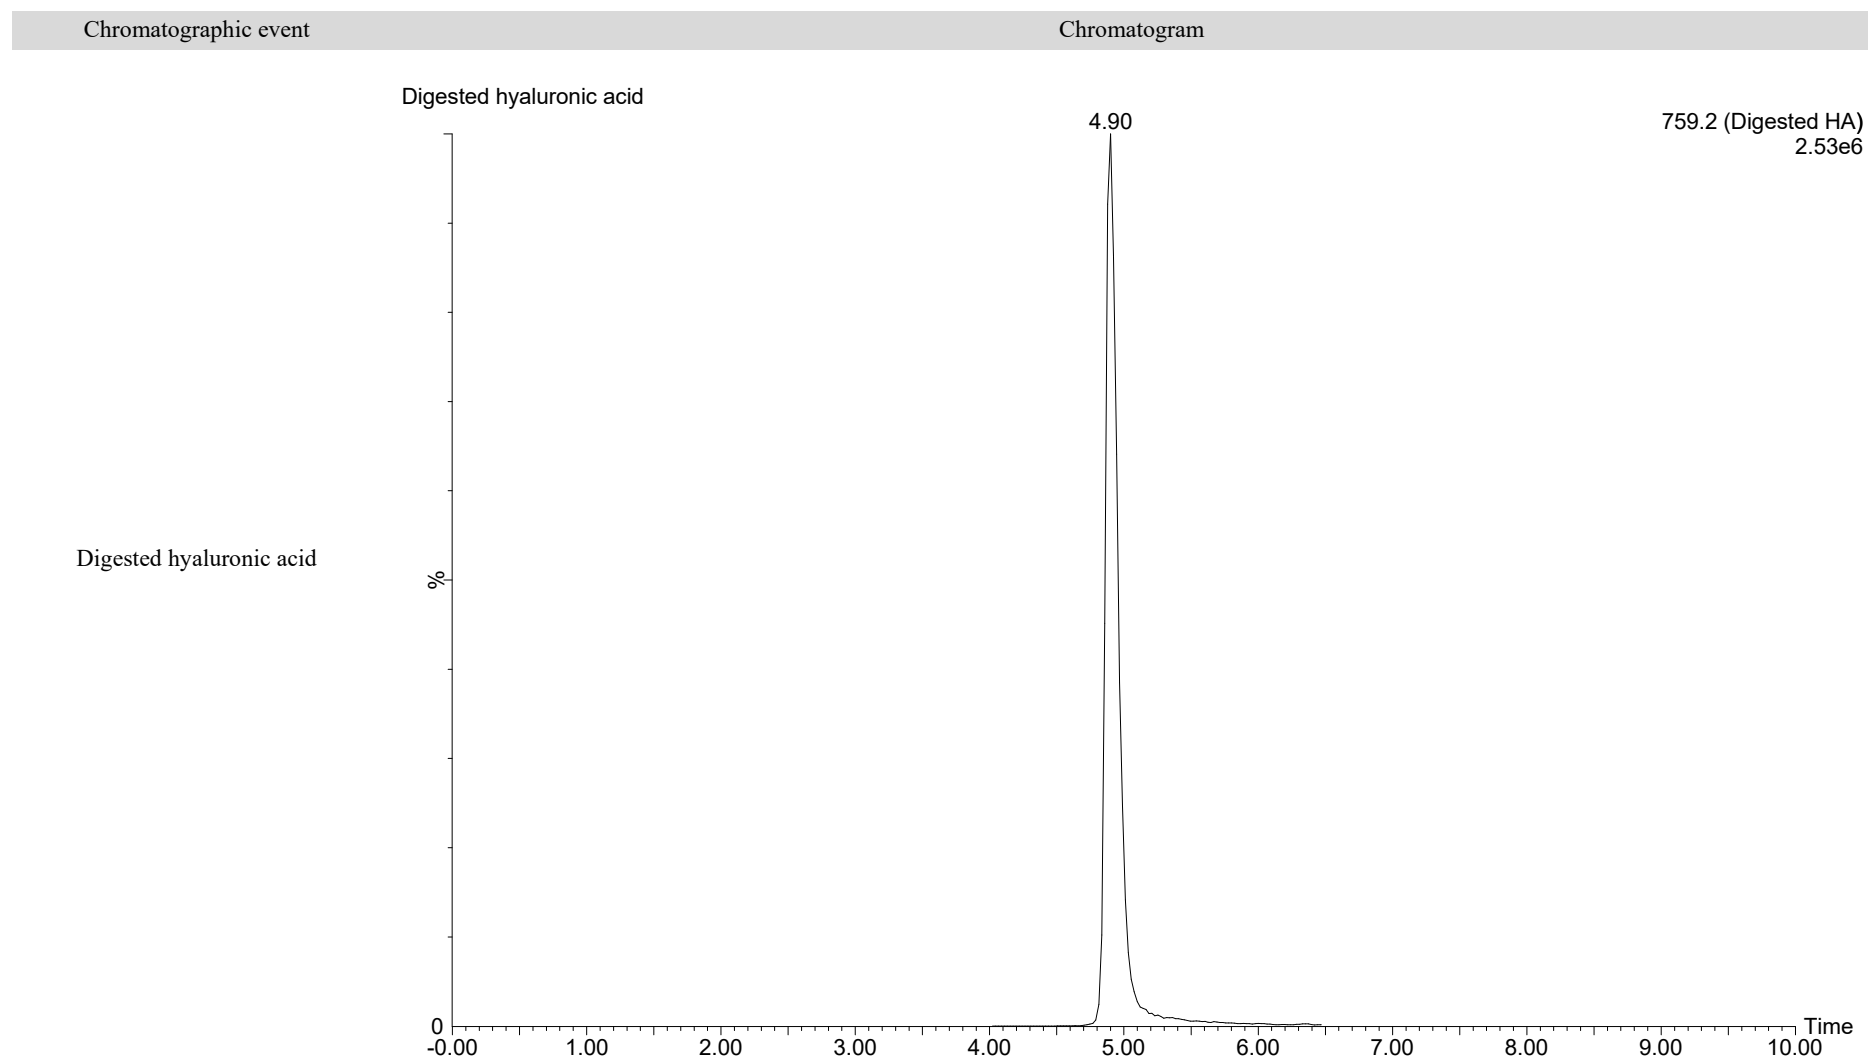

Supplementary Table 5. Chromatograms of all the chromatographic methods and quantified molecules (continuation)

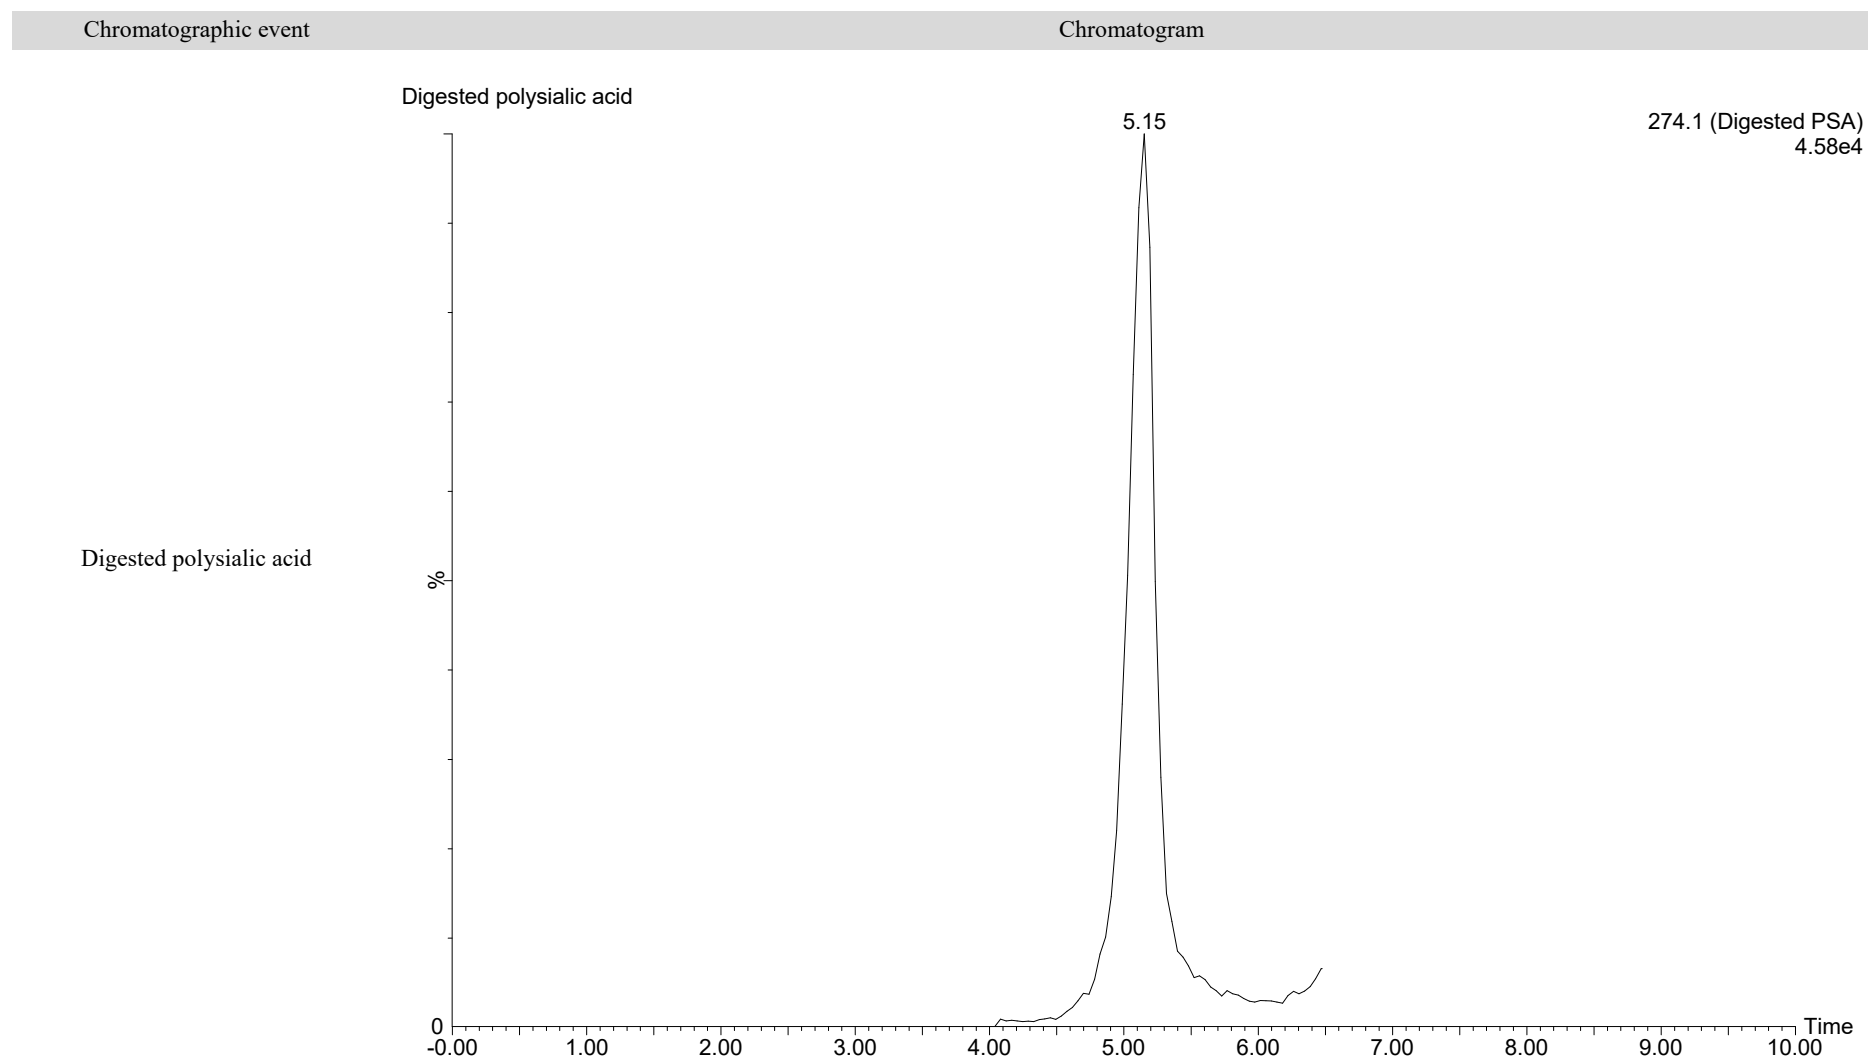

Supplementary Table 5. Chromatograms of all the chromatographic methods and quantified molecules (continuation)

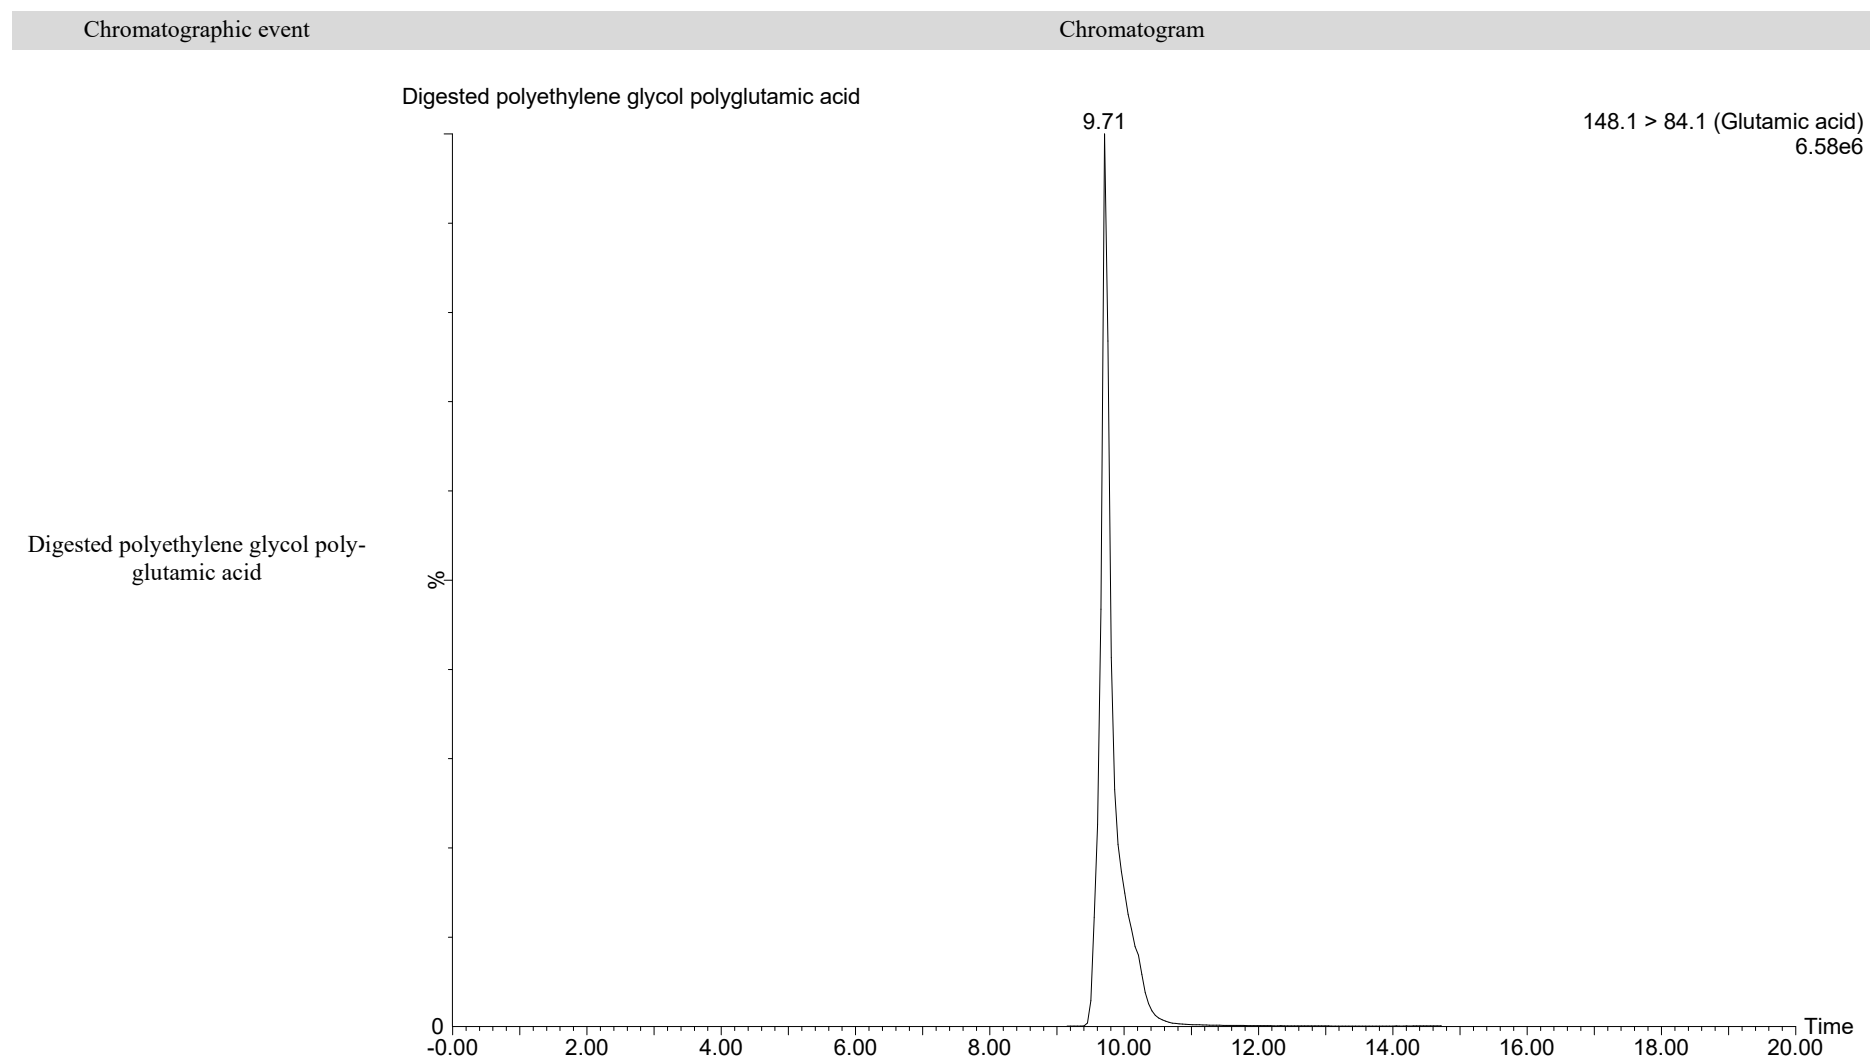

Supplementary Table 6. MS and MS/MS spectra for all the quantified substances

| Substance                | MS spectra                                                     | MS/MS spectra                                                                |
|--------------------------|----------------------------------------------------------------|------------------------------------------------------------------------------|
| DL- $\alpha$ -tocopherol | <p>D-<math>\alpha</math>-tocopherol (MS spectrum) DP: 40 V</p> | <p>D-<math>\alpha</math>-tocopherol (MS/MS spectrum) DP: 40 V; CE: 18 eV</p> |
|                          | MS2 ES+<br>5.38e6                                              | Daughters of 431ES+<br>431.48 5.29e7                                         |
| Benzethonium             | <p>Benzethonium (MS spectrum) DP: 45 V</p>                     | <p>Benzethonium (MS/MS spectrum) DP: 45 V; CE: 44 eV</p>                     |
|                          | MS2 ES+<br>1.10e7                                              | Daughters of 412ES+<br>91.02 1.34e8                                          |

Supplementary Table 6. MS and MS/MS spectra for all the quantified substances (continuation)

| Substance                                                  | MS spectra                                                                                                              | MS/MS spectra                                                                                                                                     |
|------------------------------------------------------------|-------------------------------------------------------------------------------------------------------------------------|---------------------------------------------------------------------------------------------------------------------------------------------------|
| D- $\alpha$ -tocopherol polyethylene glycol 1000 succinate | <p>D-<math>\alpha</math>-tocopherol polyethylene glycol 1000 succinate (MS spectrum) DP: 50 V</p> <p>MS2 ES+ 1.07e6</p> | <p>D-<math>\alpha</math>-tocopherol polyethylene glycol 1000 succinate (MS/MS spectrum) DP: 50 V; CE: 30 eV</p> <p>Daughters of 557ES+ 1.99e7</p> |
| Hexadecyltrimethylammonium                                 | <p>Hexadecyltrimethylammonium (MS spectrum) DP: 2 V</p> <p>MS2 ES+ 5.83e7</p>                                           | <p>Hexadecyltrimethylammonium (MS/MS spectrum) DP: 2 V; CE: 28 eV</p> <p>Daughters of 284ES+ 1.29e8</p>                                           |

Supplementary Table 6. MS and MS/MS spectra for all the quantified substances (continuation)

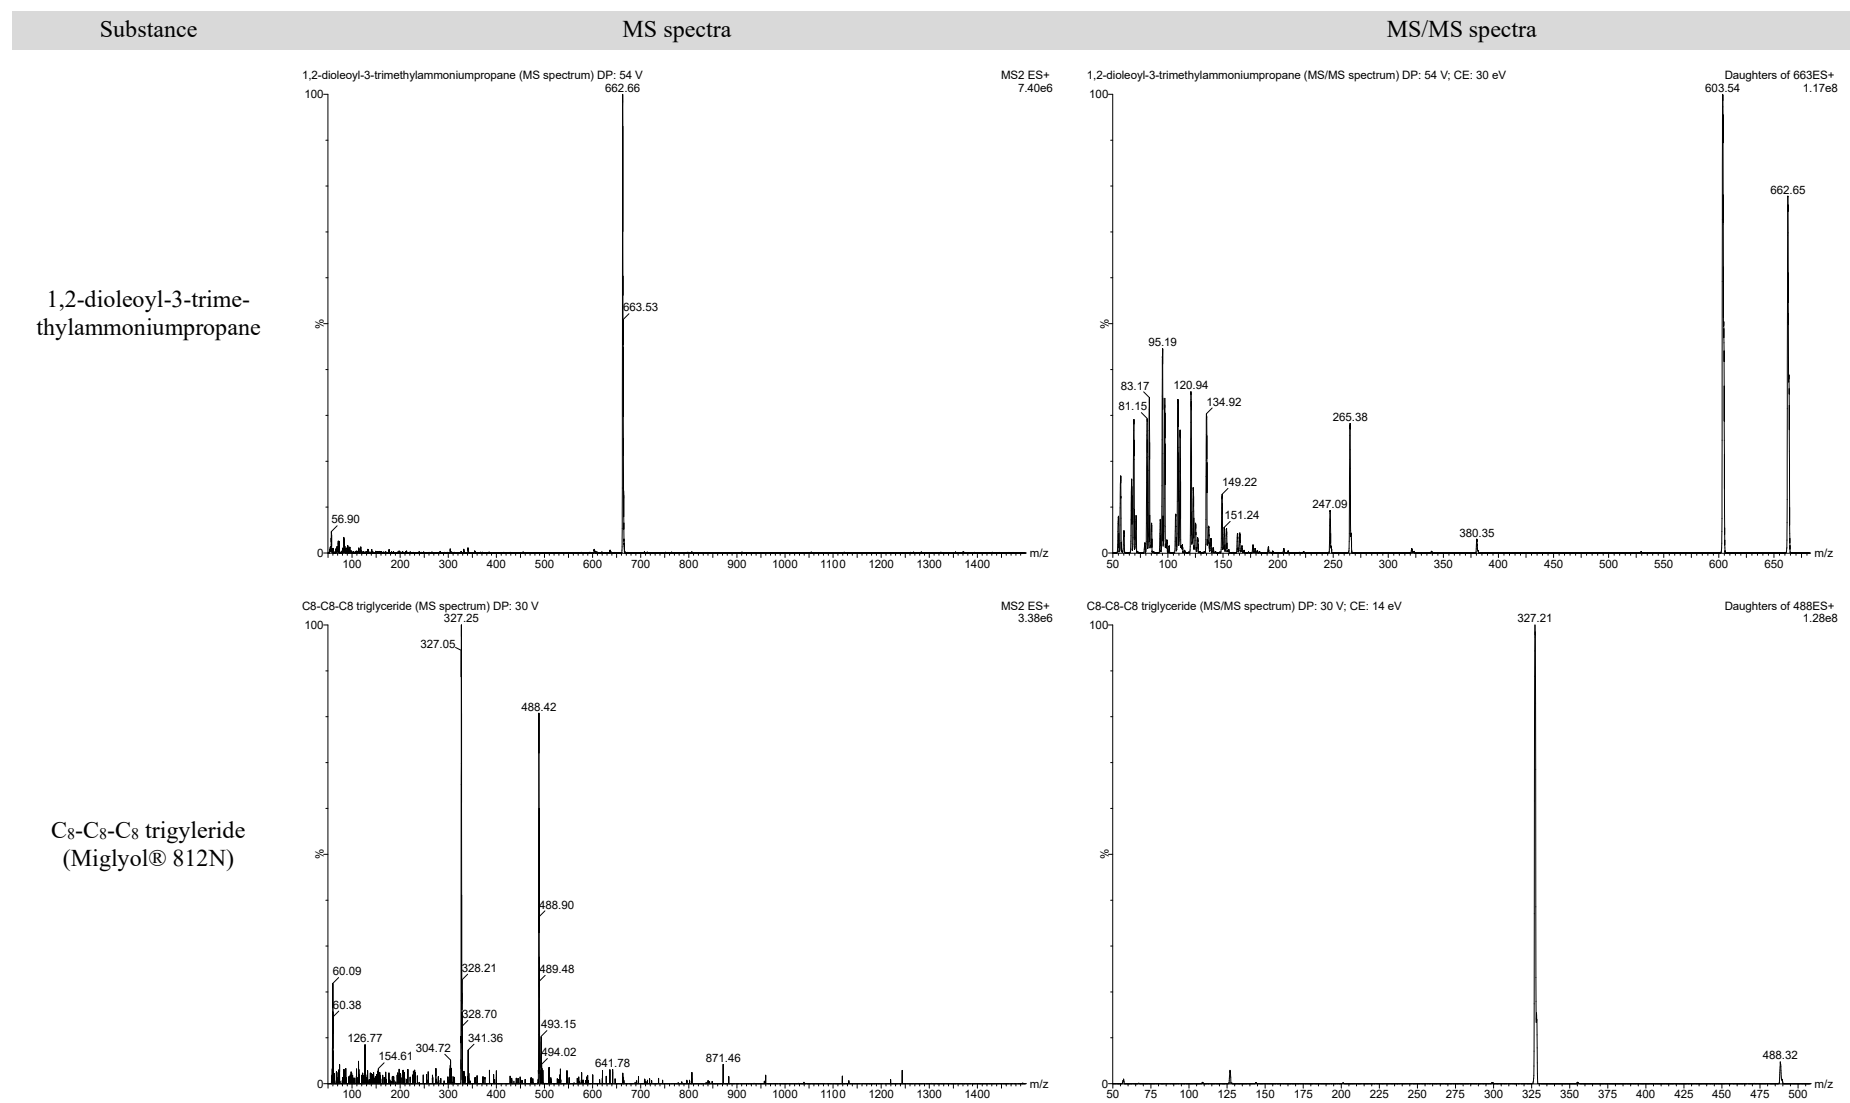

Supplementary Table 6. MS and MS/MS spectra for all the quantified substances (continuation)

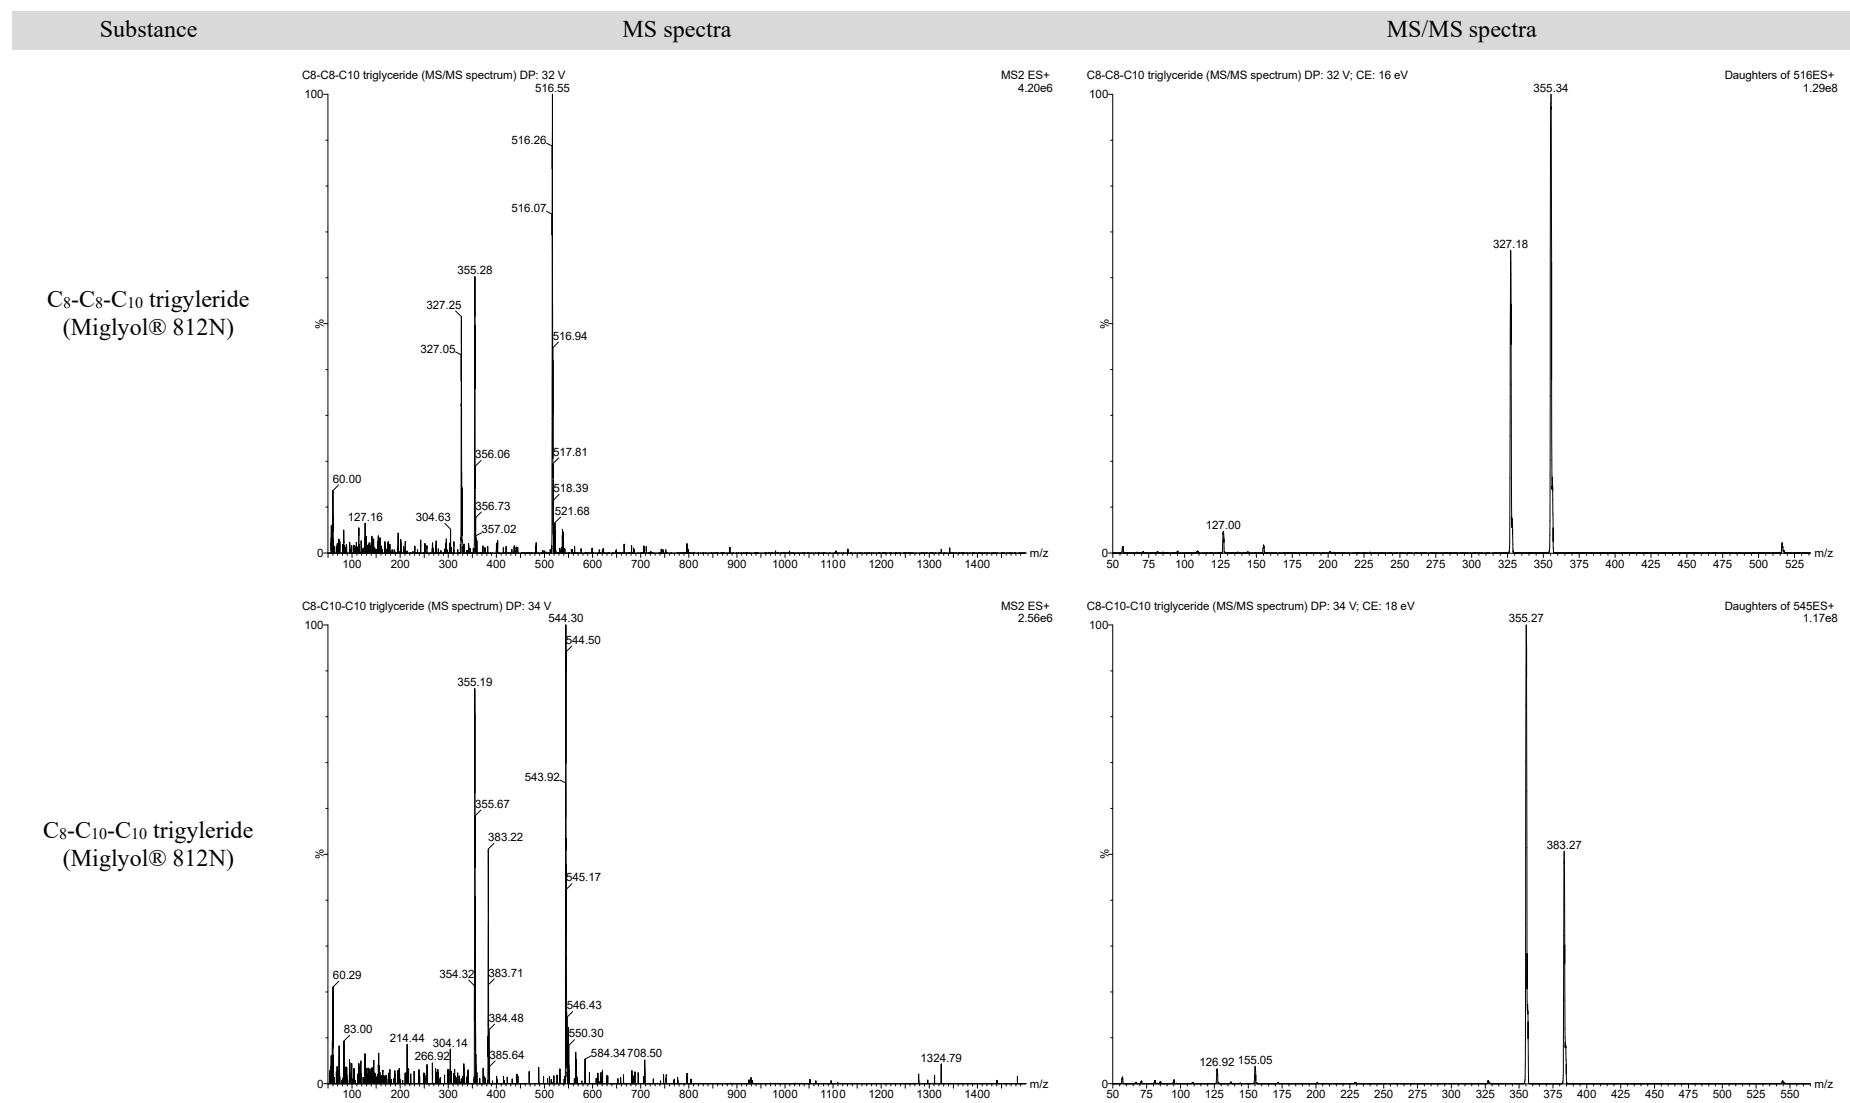



Supplementary Table 6. MS and MS/MS spectra for all the quantified substances (continuation)

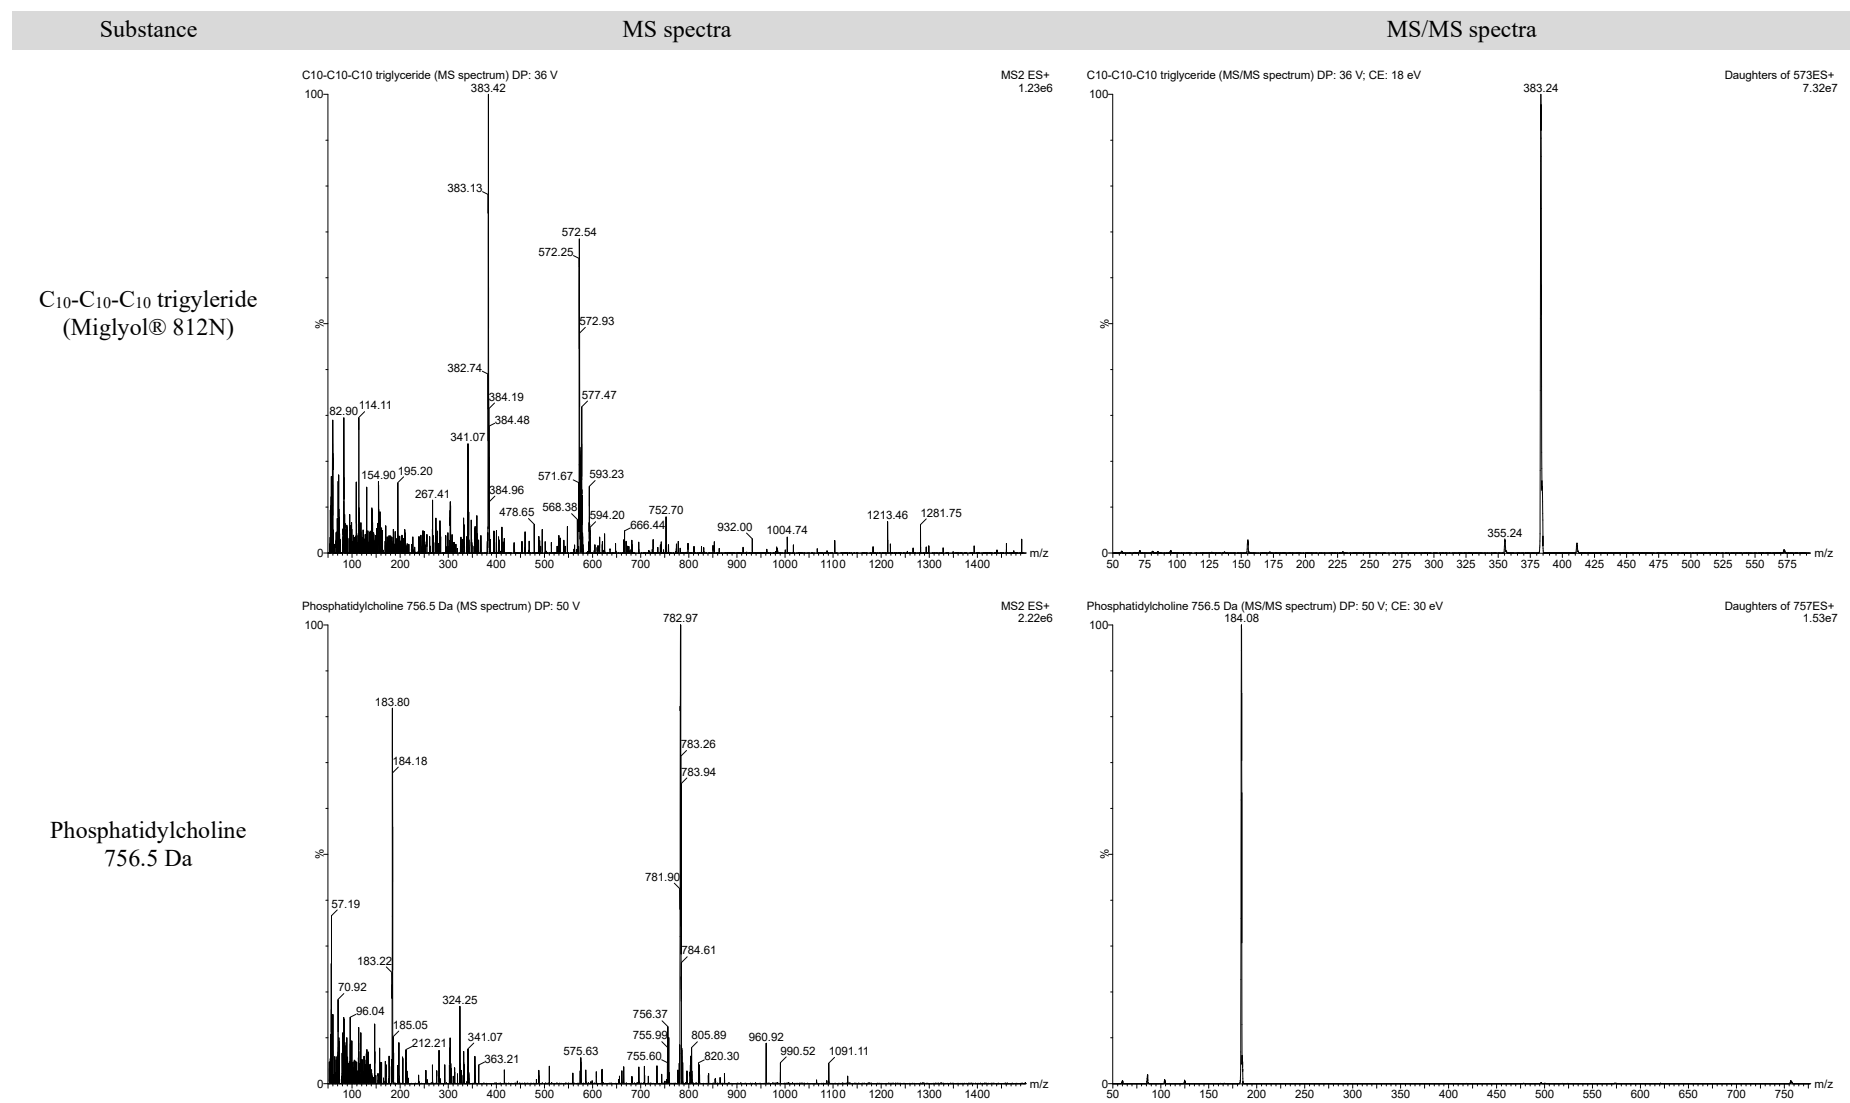

Supplementary Table 6. MS and MS/MS spectra for all the quantified substances (continuation)

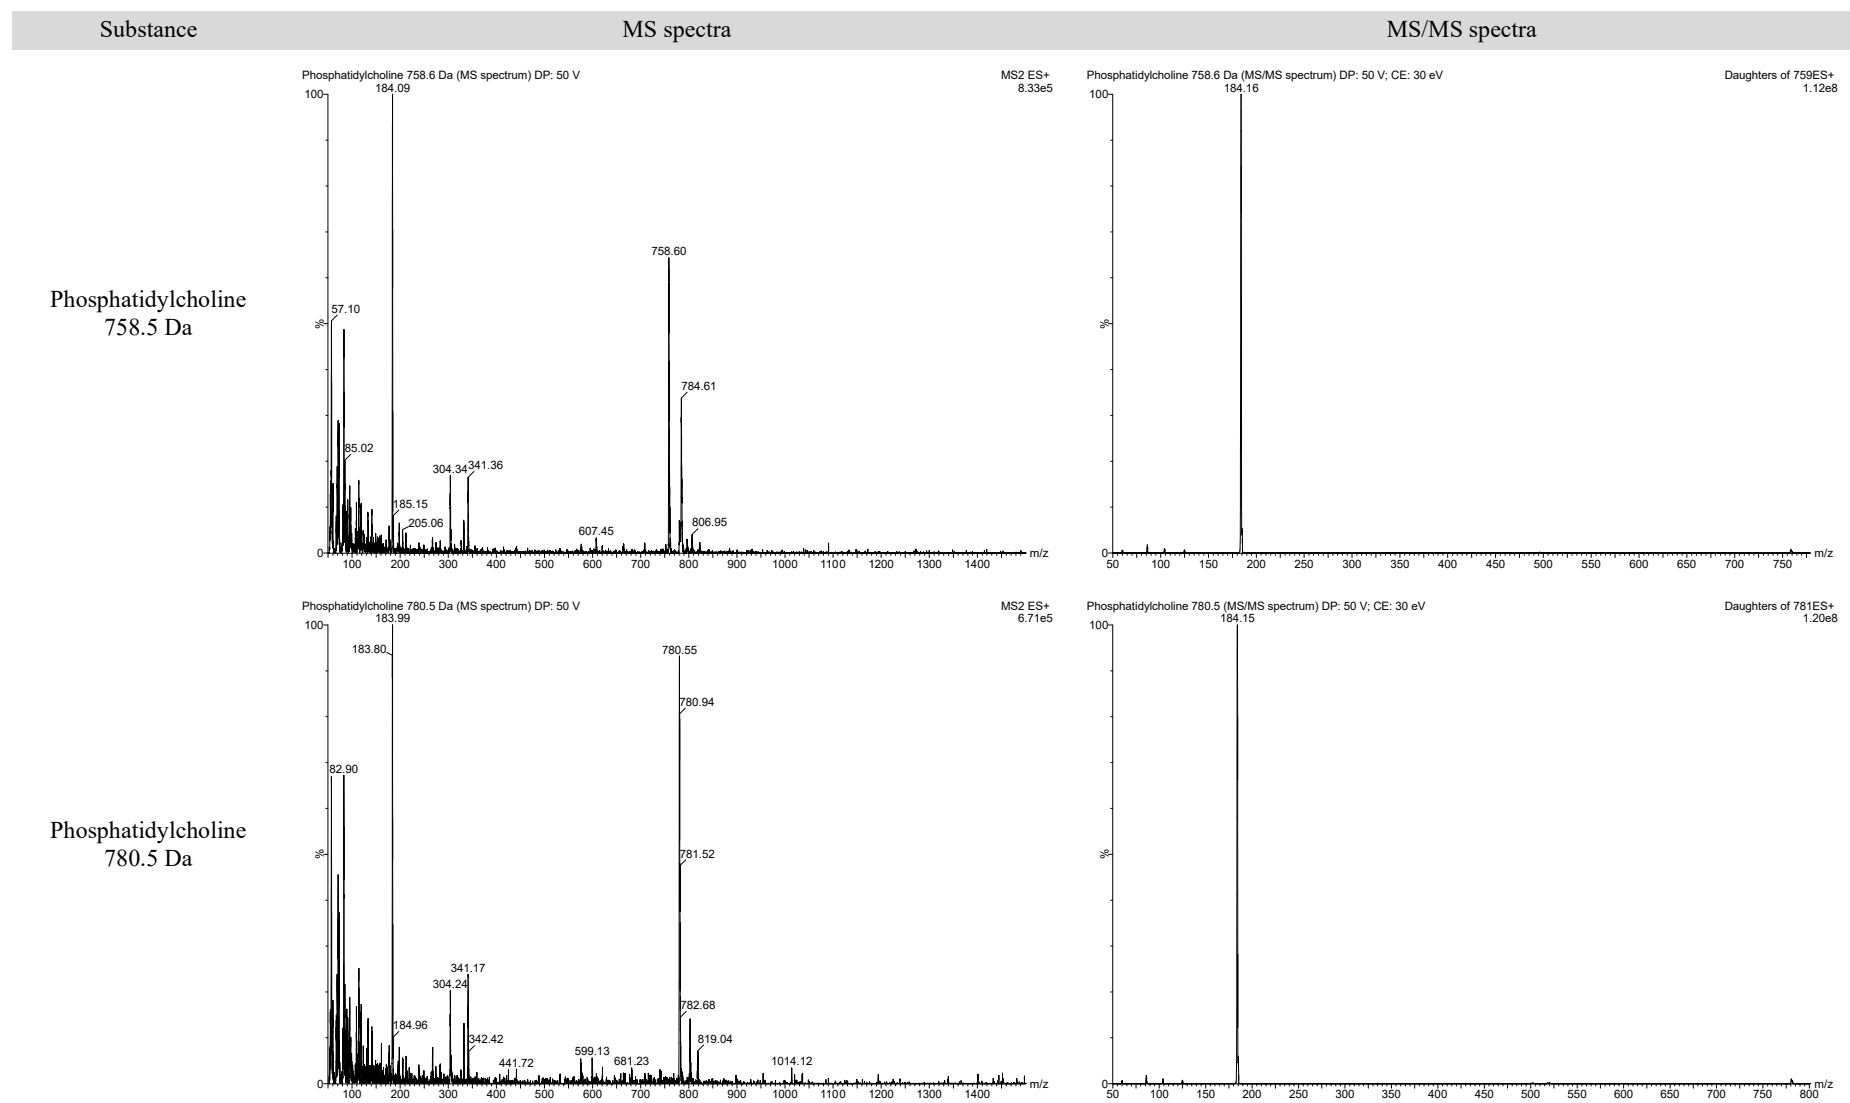

Supplementary Table 6. MS and MS/MS spectra for all the quantified substances (continuation)

| Substance                        | MS spectra                                                                           | MS/MS spectra                                                                                                  |
|----------------------------------|--------------------------------------------------------------------------------------|----------------------------------------------------------------------------------------------------------------|
| Phosphatidylcholine<br>782.5 Da  | <p>Phosphatidylcholine 782.5 Da (MS spectrum) DP: 50 V</p> <p>MS2 ES+<br/>1.39e6</p> | <p>Phosphatidylcholine 782.5 Da (MS/MS spectrum) DP: 50 V; CE: 30 eV</p> <p>Daughters of 783ES+<br/>1.30e8</p> |
| Macrogol-15-hydroxys-<br>tearate | <p>Macrogol-15-hydroxysteareate (MS spectrum) DP: 90 V</p> <p>MS2 ES+<br/>8.45e7</p> | N/A                                                                                                            |

Supplementary Table 6. MS and MS/MS spectra for all the quantified substances (continuation)

| Substance                | MS spectra                                              | MS/MS spectra                                                                                                      |
|--------------------------|---------------------------------------------------------|--------------------------------------------------------------------------------------------------------------------|
| Polysorbate 80           | <p>Polysorbate 80 (MS spectrum) DP: 30 V</p>            | <p>Polysorbate 80 (MS/MS spectrum) DP: 30 V; CE: 40 eV</p> <p>MS2 ES+ 5.67e5</p> <p>Daughters of 805ES+ 1.82e7</p> |
| Digested hyaluronic acid | <p>Digested hyaluronic acid (MS spectrum) DP: 100 V</p> | N/A                                                                                                                |

Supplementary Table 6. MS and MS/MS spectra for all the quantified substances (continuation)

| Substance                                      | MS spectra                                                                                             | MS/MS spectra                                                                                                                    |
|------------------------------------------------|--------------------------------------------------------------------------------------------------------|----------------------------------------------------------------------------------------------------------------------------------|
| Digested polysialic acid                       | <p>Digested polysialic acid (MS spectrum) DP: 100 V</p> <p>MS2 ES+<br/>1.03e6</p>                      | N/A                                                                                                                              |
| Digested polyethylene glycol polyglutamic acid | <p>Digested polyethylene glycol polyglutamic acid (MS spectrum) DP: 18 V</p> <p>MS2 ES+<br/>5.23e6</p> | <p>Digested polyethylene glycol polyglutamic acid (MS/MS spectrum) DP: 18 V; CE: 16 eV</p> <p>Daughters of 148ES+<br/>9.90e4</p> |

DP: declustering potential. CE: collision energy. N/A: not applicable. MS spectra were registered with the same DP as the one in the analytical method. MS/MS spectra were registered with the same DP and CE as the ones in the analytical method.

Supplementary Table 7. Mass spectrometry methodology and fragmentation pattern of the NCs' components

| Substance                                                  | Method                                                       | Parent                                                                               | Daughter                                                                              | Ref. |
|------------------------------------------------------------|--------------------------------------------------------------|--------------------------------------------------------------------------------------|---------------------------------------------------------------------------------------|------|
| DL- $\alpha$ -tocopherol                                   | MRM, $m/z$ 431.4 $\rightarrow$ 165.0,<br>DP: 40 V, CE: 18 eV | 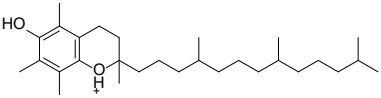   |    | 1,2  |
| Benzethonium chloride                                      | MRM, $m/z$ 412.3 $\rightarrow$ 91.0,<br>DP: 45 V, CE: 44 eV  |    |    | 3,4  |
| D- $\alpha$ -tocopherol polyethylene glycol 1000 succinate | MRM, $m/z$ 557.4 $\rightarrow$ 99.0,<br>DP: 50 V, CE: 30 eV  |    |    | -    |
| Hexadecyltrimethylammonium bromide                         | MRM, $m/z$ 284.3 $\rightarrow$ 60.1,<br>DP: 2 V, CE: 28 eV   |    |    | 5    |
| 1,2-dioleoyl-3-trimethylammoniumpropane chloride           | MRM, $m/z$ 662.6 $\rightarrow$ 603.5,<br>DP: 54 V, CE: 30 eV |    |    | 6    |
| Miglyol® 812N                                              | MRM, $m/z$ 488.4 $\rightarrow$ 327.2,<br>DP: 30 V, CE: 14 eV |    |    | 7    |
|                                                            | MRM, $m/z$ 516.4 $\rightarrow$ 355.3,<br>DP: 32 V, CE: 16 eV |   |   | 7    |
|                                                            | MRM, $m/z$ 544.5 $\rightarrow$ 355.3,<br>DP: 34 V, CE: 18 eV |  |  | 7    |
|                                                            | MRM, $m/z$ 572.5 $\rightarrow$ 383.3,<br>DP: 36 V, CE: 18 eV |  |  | 7    |

Supplementary Table 7. Mass spectrometry methodology and fragmentation pattern of the NCs' components (continuation)

| Substance                                      | Method                                             | Parent                                                                              | Daughter                                                                              | Ref.  |
|------------------------------------------------|----------------------------------------------------|-------------------------------------------------------------------------------------|---------------------------------------------------------------------------------------|-------|
| Phosphatidylcholines (Epikuron™ 145V)          | MRM, $m/z$ 756.6 → 184.1, DP: 50 V, CE: 30 eV      | 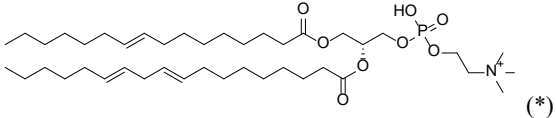  |    | 8     |
|                                                | MRM, $m/z$ 758.6 → 184.1, DP: 50 V, CE: 30 eV      |   |    |       |
|                                                | MRM, $m/z$ 780.6 → 184.1, DP: 50 V, CE: 30 eV      |   |    |       |
|                                                | MRM, $m/z$ 782.5 → 184.1, DP: 50 V, CE: 30 eV      |   |    |       |
| Macrogol-15-hydroxystearate (Kolliphor® HS15)  | PseudoMRM, $m/z$ 309.3 → 309.3, DP: 90 V, CE: 5 eV |   | N/A                                                                                   | 9     |
| Polysorbate 80                                 | MRM, $m/z$ 804.6 → 309.3, DP: 30 V, CE: 40 eV      | N/D                                                                                 |    | 10    |
| Digested hyaluronic acid                       | SIM, $m/z$ 759.2, DP: 100 V                        |  | N/A                                                                                   | 11–13 |
| Digested polysialic acid                       | SIM, $m/z$ 274.1, DP: 100 V                        |  | N/A                                                                                   | 14,15 |
| Digested polyethylene glycol polyglutamic acid | MRM, $m/z$ 148.1 → 84.1, DP: 18 V, CE: 16 eV       |  |  | 16    |

MRM: multiple reaction monitoring. SIM: Selected ion monitoring. DP: declustering potential. CE: collision energy. N/A: not applicable. N/D: not determined. (\*): A possible structure; other molecules with the same  $m/z$  may co-exist.

Supplementary Table 8. Calibration curves and residual plots of all the quantified substances

| Formulation | Molecule     | Rep. | Residual plots and calibration curves                                                                                                                                                                                                                                                                                                                                                                                      |
|-------------|--------------|------|----------------------------------------------------------------------------------------------------------------------------------------------------------------------------------------------------------------------------------------------------------------------------------------------------------------------------------------------------------------------------------------------------------------------------|
| SD-/PEG-HA  | Benzethonium | 1    | <p>Compound name: benzethonium<br/>                     Correlation coefficient: <math>r = 0.998880</math>, <math>r^2 = 0.997761</math><br/>                     Calibration curve: <math>20062.6 * x + 84251.2</math><br/>                     Response type: External Std, Area<br/>                     Curve type: Linear, Origin: Exclude, Weighting: 1/x, Axis trans: None</p>                                       |
|             |              | 2    | <p>Compound name: benzethonium<br/>                     Correlation coefficient: <math>r = 0.997675</math>, <math>r^2 = 0.995356</math><br/>                     Calibration curve: <math>20667.3 * x + 109777</math><br/>                     Response type: External Std, Area<br/>                     Curve type: Linear, Origin: Exclude, Weighting: 1/x, Axis trans: None</p>                                        |
|             |              | 3    | <p>Compound name: benzethonium<br/>                     Correlation coefficient: <math>r = 0.997362</math>, <math>r^2 = 0.994731</math><br/>                     Calibration curve: <math>18278.7 * x + 118770</math><br/>                     Response type: External Std, Area<br/>                     Curve type: Linear, Origin: Exclude, Weighting: 1/x, Axis trans: None</p>                                        |
|             |              | 1    | <p>Compound name: D-α-tocopherol polyethylene glycol 1000 succinate<br/>                     Correlation coefficient: <math>r = 0.990478</math>, <math>r^2 = 0.981047</math><br/>                     Calibration curve: <math>181.548 * x + 1133.68</math><br/>                     Response type: External Std, Area<br/>                     Curve type: Linear, Origin: Exclude, Weighting: 1/x, Axis trans: None</p>  |
|             |              | 2    | <p>Compound name: D-α-tocopherol polyethylene glycol 1000 succinate<br/>                     Correlation coefficient: <math>r = 0.993116</math>, <math>r^2 = 0.986279</math><br/>                     Calibration curve: <math>190.369 * x + -843.895</math><br/>                     Response type: External Std, Area<br/>                     Curve type: Linear, Origin: Exclude, Weighting: 1/x, Axis trans: None</p> |
|             |              | 3    | <p>Compound name: D-α-tocopherol polyethylene glycol 1000 succinate<br/>                     Correlation coefficient: <math>r = 0.994383</math>, <math>r^2 = 0.988797</math><br/>                     Calibration curve: <math>398.723 * x + -2160.03</math><br/>                     Response type: External Std, Area<br/>                     Curve type: Linear, Origin: Exclude, Weighting: 1/x, Axis trans: None</p> |



Supplementary Table 8. Calibration curves and residual plots of all the quantified substances (continuation)

| Formulation                         | Molecule                | Rep. | Residual plots and calibration curves                                                                                                                                                                                                                                                                                                                     |                                                                                                                                                                                                                                                                                                                                                            |
|-------------------------------------|-------------------------|------|-----------------------------------------------------------------------------------------------------------------------------------------------------------------------------------------------------------------------------------------------------------------------------------------------------------------------------------------------------------|------------------------------------------------------------------------------------------------------------------------------------------------------------------------------------------------------------------------------------------------------------------------------------------------------------------------------------------------------------|
| SD- <i>l</i> -PEG-HA (continuation) | D- $\alpha$ -tocopherol | 1    | Compound name: DL- $\alpha$ -tocopherol<br>Correlation coefficient: $r = 0.996368$ , $r^2 = 0.992749$<br>Calibration curve: $161.6 * x + -621.845$<br>Response type: External Std, Area<br>Curve type: Linear, Origin: Exclude, Weighting: 1/x, Axis trans: None<br>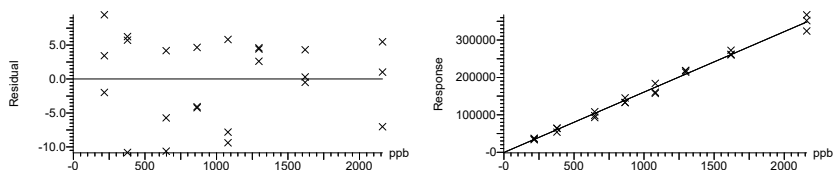    |                                                                                                                                                                                                                                                                                                                                                            |
|                                     |                         | 2    | Compound name: DL- $\alpha$ -tocopherol<br>Correlation coefficient: $r = 0.996091$ , $r^2 = 0.992198$<br>Calibration curve: $134.842 * x + 259.387$<br>Response type: External Std, Area<br>Curve type: Linear, Origin: Exclude, Weighting: 1/x, Axis trans: None<br>   |                                                                                                                                                                                                                                                                                                                                                            |
|                                     |                         | 3    | Compound name: DL- $\alpha$ -tocopherol<br>Correlation coefficient: $r = 0.999656$ , $r^2 = 0.999312$<br>Calibration curve: $126.766 * x + -621.553$<br>Response type: External Std, Area<br>Curve type: Linear, Origin: Exclude, Weighting: 1/x, Axis trans: None<br> |                                                                                                                                                                                                                                                                                                                                                            |
|                                     | Hyaluronic acid (whole) | 1    | 1                                                                                                                                                                                                                                                                                                                                                         | Compound name: Digested hyaluronic acid<br>Correlation coefficient: $r = 0.994386$ , $r^2 = 0.988803$<br>Calibration curve: $4130.13 * x + 9837.9$<br>Response type: External Std, Area<br>Curve type: Linear, Origin: Exclude, Weighting: 1/x, Axis trans: None<br>   |
|                                     |                         |      | 2                                                                                                                                                                                                                                                                                                                                                         | Compound name: Digested hyaluronic acid<br>Correlation coefficient: $r = 0.995225$ , $r^2 = 0.990474$<br>Calibration curve: $4373.25 * x + -7479.95$<br>Response type: External Std, Area<br>Curve type: Linear, Origin: Exclude, Weighting: 1/x, Axis trans: None<br> |
|                                     |                         |      | 3                                                                                                                                                                                                                                                                                                                                                         | Compound name: Digested hyaluronic acid<br>Correlation coefficient: $r = 0.994960$ , $r^2 = 0.989945$<br>Calibration curve: $4461.42 * x + 1376.84$<br>Response type: External Std, Area<br>Curve type: Linear, Origin: Exclude, Weighting: 1/x, Axis trans: None<br>  |

Supplementary Table 8. Calibration curves and residual plots of all the quantified substances (continuation)

| Formulation                         | Molecule        | Rep. | Residual plots and calibration curves                                                                                                                                                                                                                                                                                                                                                             |
|-------------------------------------|-----------------|------|---------------------------------------------------------------------------------------------------------------------------------------------------------------------------------------------------------------------------------------------------------------------------------------------------------------------------------------------------------------------------------------------------|
| SD- <i>l</i> -PEG-HA (continuation) | Hyaluronic acid | 1    | <p>Compound name: Digested hyaluronic acid<br/>                     Correlation coefficient: <math>r = 0.992396</math>, <math>r^2 = 0.984849</math><br/>                     Calibration curve: <math>4199.58 * x + 6712.82</math><br/>                     Response type: External Std, Area<br/>                     Curve type: Linear, Origin: Exclude, Weighting: 1/x, Axis trans: None</p>  |
|                                     |                 | 2    | <p>Compound name: Digested hyaluronic acid<br/>                     Correlation coefficient: <math>r = 0.994621</math>, <math>r^2 = 0.989270</math><br/>                     Calibration curve: <math>4207 * x + -11030.1</math><br/>                     Response type: External Std, Area<br/>                     Curve type: Linear, Origin: Exclude, Weighting: 1/x, Axis trans: None</p>    |
|                                     |                 | 3    | <p>Compound name: Digested hyaluronic acid<br/>                     Correlation coefficient: <math>r = 0.996289</math>, <math>r^2 = 0.992591</math><br/>                     Calibration curve: <math>4373.41 * x + -583.121</math><br/>                     Response type: External Std, Area<br/>                     Curve type: Linear, Origin: Exclude, Weighting: 1/x, Axis trans: None</p> |
|                                     |                 | 1    | <p>Compound name: Digested hyaluronic acid<br/>                     Correlation coefficient: <math>r = 0.995210</math>, <math>r^2 = 0.990444</math><br/>                     Calibration curve: <math>4956.23 * x + 2094.75</math><br/>                     Response type: External Std, Area<br/>                     Curve type: Linear, Origin: Exclude, Weighting: 1/x, Axis trans: None</p>  |
|                                     |                 | 2    | <p>Compound name: Digested hyaluronic acid<br/>                     Correlation coefficient: <math>r = 0.990110</math>, <math>r^2 = 0.980318</math><br/>                     Calibration curve: <math>4668.12 * x + 1446.87</math><br/>                     Response type: External Std, Area<br/>                     Curve type: Linear, Origin: Exclude, Weighting: 1/x, Axis trans: None</p>  |
|                                     |                 | 3    | <p>Compound name: Digested hyaluronic acid<br/>                     Correlation coefficient: <math>r = 0.990600</math>, <math>r^2 = 0.981288</math><br/>                     Calibration curve: <math>4955.03 * x + -8467.49</math><br/>                     Response type: External Std, Area<br/>                     Curve type: Linear, Origin: Exclude, Weighting: 1/x, Axis trans: None</p> |

Supplementary Table 8. Calibration curves and residual plots of all the quantified substances (continuation)

| Formulation | Molecule | Rep.                  | Residual plots and calibration curves                                                                                                                                                                                                                                                                                                                                                                                                                                                 |   |                                                                                                                                                                                                                                                                                                                                                                                                                                                                               |
|-------------|----------|-----------------------|---------------------------------------------------------------------------------------------------------------------------------------------------------------------------------------------------------------------------------------------------------------------------------------------------------------------------------------------------------------------------------------------------------------------------------------------------------------------------------------|---|-------------------------------------------------------------------------------------------------------------------------------------------------------------------------------------------------------------------------------------------------------------------------------------------------------------------------------------------------------------------------------------------------------------------------------------------------------------------------------|
| SD-noPEG-HA | CTAB     | 1                     | <p>Compound name: hexadecyltrimethylammonium<br/>                     Correlation coefficient: <math>r = 0.998943</math>, <math>r^2 = 0.997887</math><br/>                     Calibration curve: <math>4126.68 * x + 13983.3</math><br/>                     Response type: External Std, Area<br/>                     Curve type: Linear, Origin: Exclude, Weighting: 1/x, Axis trans: None</p> 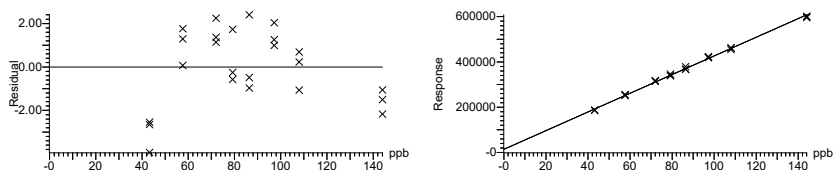 |   |                                                                                                                                                                                                                                                                                                                                                                                                                                                                               |
|             |          | 2                     | <p>Compound name: hexadecyltrimethylammonium<br/>                     Correlation coefficient: <math>r = 0.999078</math>, <math>r^2 = 0.998157</math><br/>                     Calibration curve: <math>4266.63 * x + 22962.8</math><br/>                     Response type: External Std, Area<br/>                     Curve type: Linear, Origin: Exclude, Weighting: 1/x, Axis trans: None</p>  |   |                                                                                                                                                                                                                                                                                                                                                                                                                                                                               |
|             |          | 3                     | <p>Compound name: hexadecyltrimethylammonium<br/>                     Correlation coefficient: <math>r = 0.999769</math>, <math>r^2 = 0.999538</math><br/>                     Calibration curve: <math>4265.8 * x + 15844.5</math><br/>                     Response type: External Std, Area<br/>                     Curve type: Linear, Origin: Exclude, Weighting: 1/x, Axis trans: None</p>  |   |                                                                                                                                                                                                                                                                                                                                                                                                                                                                               |
|             |          | C8-C8-C8 Triglyceride | C8-C8-C8 Triglyceride                                                                                                                                                                                                                                                                                                                                                                                                                                                                 | 1 | <p>Compound name: C8-C8-C8 TG<br/>                     Correlation coefficient: <math>r = 0.994379</math>, <math>r^2 = 0.988791</math><br/>                     Calibration curve: <math>2109.29 * x + 1.23567e+006</math><br/>                     Response type: External Std, Area<br/>                     Curve type: Linear, Origin: Exclude, Weighting: 1/x, Axis trans: None</p>  |
|             |          |                       |                                                                                                                                                                                                                                                                                                                                                                                                                                                                                       | 2 | <p>Compound name: C8-C8-C8 TG<br/>                     Correlation coefficient: <math>r = 0.994465</math>, <math>r^2 = 0.988961</math><br/>                     Calibration curve: <math>1111.31 * x + 527248</math><br/>                     Response type: External Std, Area<br/>                     Curve type: Linear, Origin: Exclude, Weighting: 1/x, Axis trans: None</p>        |
|             |          |                       |                                                                                                                                                                                                                                                                                                                                                                                                                                                                                       | 3 | <p>Compound name: C8-C8-C8 TG<br/>                     Correlation coefficient: <math>r = 0.993040</math>, <math>r^2 = 0.986129</math><br/>                     Calibration curve: <math>1850.95 * x + 977854</math><br/>                     Response type: External Std, Area<br/>                     Curve type: Linear, Origin: Exclude, Weighting: 1/x, Axis trans: None</p>        |

Supplementary Table 8. Calibration curves and residual plots of all the quantified substances (continuation)

| Formulation                | Molecule                                                  | Rep. | Residual plots and calibration curves                                                                                                                                                                                                                                                                                                                                                                                                                                                                          |
|----------------------------|-----------------------------------------------------------|------|----------------------------------------------------------------------------------------------------------------------------------------------------------------------------------------------------------------------------------------------------------------------------------------------------------------------------------------------------------------------------------------------------------------------------------------------------------------------------------------------------------------|
| SD-noPEG-HA (continuation) | C <sub>8</sub> -C <sub>8</sub> -C <sub>10</sub> glyceride | 1    | <p>Compound name: C<sub>8</sub>-C<sub>8</sub>-C<sub>10</sub> TG<br/>                     Correlation coefficient: <math>r = 0.991232</math>, <math>r^2 = 0.982542</math><br/>                     Calibration curve: <math>2391.65 * x + 1.51379e+006</math><br/>                     Response type: External Std, Area<br/>                     Curve type: Linear, Origin: Exclude, Weighting: 1/x, Axis trans: None</p> 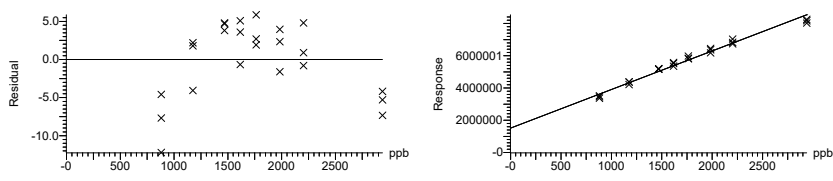  |
|                            |                                                           | 2    | <p>Compound name: C<sub>8</sub>-C<sub>8</sub>-C<sub>10</sub> TG<br/>                     Correlation coefficient: <math>r = 0.995155</math>, <math>r^2 = 0.990334</math><br/>                     Calibration curve: <math>1508.44 * x + 679958</math><br/>                     Response type: External Std, Area<br/>                     Curve type: Linear, Origin: Exclude, Weighting: 1/x, Axis trans: None</p>         |
|                            |                                                           | 3    | <p>Compound name: C<sub>8</sub>-C<sub>8</sub>-C<sub>10</sub> TG<br/>                     Correlation coefficient: <math>r = 0.992451</math>, <math>r^2 = 0.984958</math><br/>                     Calibration curve: <math>2200.96 * x + 1.22044e+006</math><br/>                     Response type: External Std, Area<br/>                     Curve type: Linear, Origin: Exclude, Weighting: 1/x, Axis trans: None</p>  |
|                            |                                                           | 1    | <p>Compound name: C<sub>8</sub>-C<sub>10</sub>-C<sub>10</sub> TG<br/>                     Correlation coefficient: <math>r = 0.993350</math>, <math>r^2 = 0.986744</math><br/>                     Calibration curve: <math>1618.69 * x + 866952</math><br/>                     Response type: External Std, Area<br/>                     Curve type: Linear, Origin: Exclude, Weighting: 1/x, Axis trans: None</p>      |
|                            |                                                           | 2    | <p>Compound name: C<sub>8</sub>-C<sub>10</sub>-C<sub>10</sub> TG<br/>                     Correlation coefficient: <math>r = 0.993628</math>, <math>r^2 = 0.987296</math><br/>                     Calibration curve: <math>1101.43 * x + 479398</math><br/>                     Response type: External Std, Area<br/>                     Curve type: Linear, Origin: Exclude, Weighting: 1/x, Axis trans: None</p>      |
|                            |                                                           | 3    | <p>Compound name: C<sub>8</sub>-C<sub>10</sub>-C<sub>10</sub> TG<br/>                     Correlation coefficient: <math>r = 0.990811</math>, <math>r^2 = 0.981706</math><br/>                     Calibration curve: <math>1562.36 * x + 603095</math><br/>                     Response type: External Std, Area<br/>                     Curve type: Linear, Origin: Exclude, Weighting: 1/x, Axis trans: None</p>      |

Supplementary Table 8. Calibration curves and residual plots of all the quantified substances (continuation)

| Formulation                | Molecule                                                    | Rep.                         | Residual plots and calibration curves                                                                                                                                                                                                                                                                                                                                                                                                                                     |   |                                                                                                                                                                                                                                                                                                                                                                                                                                                                        |
|----------------------------|-------------------------------------------------------------|------------------------------|---------------------------------------------------------------------------------------------------------------------------------------------------------------------------------------------------------------------------------------------------------------------------------------------------------------------------------------------------------------------------------------------------------------------------------------------------------------------------|---|------------------------------------------------------------------------------------------------------------------------------------------------------------------------------------------------------------------------------------------------------------------------------------------------------------------------------------------------------------------------------------------------------------------------------------------------------------------------|
| SD-noPEG-HA (continuation) | C <sub>10</sub> -C <sub>10</sub> -C <sub>10</sub> glyceride | 1                            | <p>Compound name: C10-C10-C10 TG<br/>                     Correlation coefficient: <math>r = 0.991252</math>, <math>r^2 = 0.982581</math><br/>                     Calibration curve: <math>520.173 * x + 215015</math><br/>                     Response type: External Std, Area<br/>                     Curve type: Linear, Origin: Exclude, Weighting: 1/x, Axis trans: None</p> 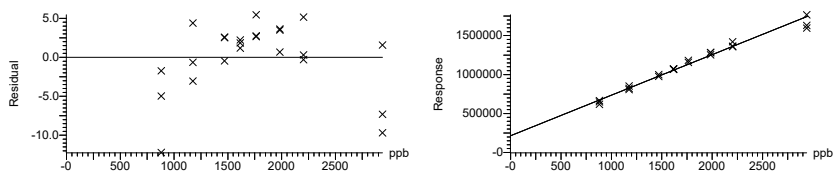  |   |                                                                                                                                                                                                                                                                                                                                                                                                                                                                        |
|                            |                                                             | 2                            | <p>Compound name: C10-C10-C10 TG<br/>                     Correlation coefficient: <math>r = 0.989802</math>, <math>r^2 = 0.979709</math><br/>                     Calibration curve: <math>374.753 * x + 106561</math><br/>                     Response type: External Std, Area<br/>                     Curve type: Linear, Origin: Exclude, Weighting: 1/x, Axis trans: None</p>   |   |                                                                                                                                                                                                                                                                                                                                                                                                                                                                        |
|                            |                                                             | 3                            | <p>Compound name: C10-C10-C10 TG<br/>                     Correlation coefficient: <math>r = 0.987630</math>, <math>r^2 = 0.975413</math><br/>                     Calibration curve: <math>498.949 * x + 127026</math><br/>                     Response type: External Std, Area<br/>                     Curve type: Linear, Origin: Exclude, Weighting: 1/x, Axis trans: None</p>  |   |                                                                                                                                                                                                                                                                                                                                                                                                                                                                        |
|                            |                                                             | 1                            | <p>Compound name: PC_756.5<br/>                     Correlation coefficient: <math>r = 0.997083</math>, <math>r^2 = 0.994175</math><br/>                     Calibration curve: <math>62.1519 * x + -6144.89</math><br/>                     Response type: External Std, Area<br/>                     Curve type: Linear, Origin: Exclude, Weighting: 1/x, Axis trans: None</p>     |   |                                                                                                                                                                                                                                                                                                                                                                                                                                                                        |
|                            |                                                             | 2                            | <p>Compound name: PC_756.5<br/>                     Correlation coefficient: <math>r = 0.996890</math>, <math>r^2 = 0.993789</math><br/>                     Calibration curve: <math>403.916 * x + -57356.6</math><br/>                     Response type: External Std, Area<br/>                     Curve type: Linear, Origin: Exclude, Weighting: 1/x, Axis trans: None</p>     |   |                                                                                                                                                                                                                                                                                                                                                                                                                                                                        |
|                            |                                                             | 3                            | <p>Compound name: PC_756.5<br/>                     Correlation coefficient: <math>r = 0.992193</math>, <math>r^2 = 0.984448</math><br/>                     Calibration curve: <math>73.7867 * x + -9540.06</math><br/>                     Response type: External Std, Area<br/>                     Curve type: Linear, Origin: Exclude, Weighting: 1/x, Axis trans: None</p>     |   |                                                                                                                                                                                                                                                                                                                                                                                                                                                                        |
|                            |                                                             | Phosphatidylcholine 756.6 Da |                                                                                                                                                                                                                                                                                                                                                                                                                                                                           | 1 | <p>Compound name: PC_756.5<br/>                     Correlation coefficient: <math>r = 0.997083</math>, <math>r^2 = 0.994175</math><br/>                     Calibration curve: <math>62.1519 * x + -6144.89</math><br/>                     Response type: External Std, Area<br/>                     Curve type: Linear, Origin: Exclude, Weighting: 1/x, Axis trans: None</p>  |
|                            |                                                             |                              |                                                                                                                                                                                                                                                                                                                                                                                                                                                                           | 2 | <p>Compound name: PC_756.5<br/>                     Correlation coefficient: <math>r = 0.996890</math>, <math>r^2 = 0.993789</math><br/>                     Calibration curve: <math>403.916 * x + -57356.6</math><br/>                     Response type: External Std, Area<br/>                     Curve type: Linear, Origin: Exclude, Weighting: 1/x, Axis trans: None</p>  |
|                            |                                                             |                              |                                                                                                                                                                                                                                                                                                                                                                                                                                                                           | 3 | <p>Compound name: PC_756.5<br/>                     Correlation coefficient: <math>r = 0.992193</math>, <math>r^2 = 0.984448</math><br/>                     Calibration curve: <math>73.7867 * x + -9540.06</math><br/>                     Response type: External Std, Area<br/>                     Curve type: Linear, Origin: Exclude, Weighting: 1/x, Axis trans: None</p>  |

Supplementary Table 8. Calibration curves and residual plots of all the quantified substances (continuation)

| Formulation                | Molecule                     | Rep. | Residual plots and calibration curves                                                                                                                                                                                                                                                                                                                                                                                                                                  |
|----------------------------|------------------------------|------|------------------------------------------------------------------------------------------------------------------------------------------------------------------------------------------------------------------------------------------------------------------------------------------------------------------------------------------------------------------------------------------------------------------------------------------------------------------------|
| SD-noPEG-HA (continuation) | Phosphatidylcholine 758.6 Da | 1    | <p>Compound name: PC_758.5<br/>                     Correlation coefficient: <math>r = 0.981541</math>, <math>r^2 = 0.963422</math><br/>                     Calibration curve: <math>465.7 * x + -47279.4</math><br/>                     Response type: External Std, Area<br/>                     Curve type: Linear, Origin: Exclude, Weighting: 1/x, Axis trans: None</p> 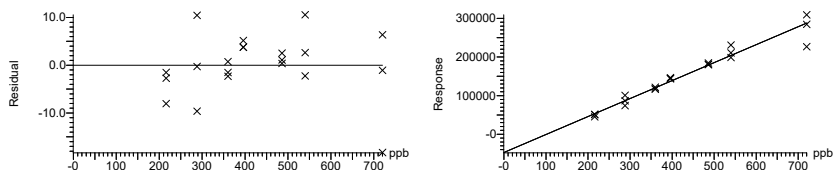     |
|                            |                              | 2    | <p>Compound name: PC_758.5<br/>                     Correlation coefficient: <math>r = 0.996625</math>, <math>r^2 = 0.993262</math><br/>                     Calibration curve: <math>427.877 * x + -61715.9</math><br/>                     Response type: External Std, Area<br/>                     Curve type: Linear, Origin: Exclude, Weighting: 1/x, Axis trans: None</p>    |
|                            |                              | 3    | <p>Compound name: PC_758.5<br/>                     Correlation coefficient: <math>r = 0.989484</math>, <math>r^2 = 0.979078</math><br/>                     Calibration curve: <math>579.431 * x + -77046.3</math><br/>                     Response type: External Std, Area<br/>                     Curve type: Linear, Origin: Exclude, Weighting: 1/x, Axis trans: None</p>   |
|                            |                              | 1    | <p>Compound name: PC_780.5<br/>                     Correlation coefficient: <math>r = 0.996934</math>, <math>r^2 = 0.993877</math><br/>                     Calibration curve: <math>249.502 * x + -22763.5</math><br/>                     Response type: External Std, Area<br/>                     Curve type: Linear, Origin: Exclude, Weighting: 1/x, Axis trans: None</p>  |
|                            |                              | 2    | <p>Compound name: PC_780.5<br/>                     Correlation coefficient: <math>r = 0.998443</math>, <math>r^2 = 0.996889</math><br/>                     Calibration curve: <math>1010.34 * x + -133621</math><br/>                     Response type: External Std, Area<br/>                     Curve type: Linear, Origin: Exclude, Weighting: 1/x, Axis trans: None</p>   |
|                            |                              | 3    | <p>Compound name: PC_780.5<br/>                     Correlation coefficient: <math>r = 0.993020</math>, <math>r^2 = 0.986089</math><br/>                     Calibration curve: <math>279.912 * x + -34205.1</math><br/>                     Response type: External Std, Area<br/>                     Curve type: Linear, Origin: Exclude, Weighting: 1/x, Axis trans: None</p>  |

Supplementary Table 8. Calibration curves and residual plots of all the quantified substances (continuation)

| Formulation                | Molecule                     | Rep. | Residual plots and calibration curves                                                                                                                                                                                                                                                                                                                                                                                                                                                  |
|----------------------------|------------------------------|------|----------------------------------------------------------------------------------------------------------------------------------------------------------------------------------------------------------------------------------------------------------------------------------------------------------------------------------------------------------------------------------------------------------------------------------------------------------------------------------------|
| SD-noPEG-HA (continuation) | Phosphatidylcholine 782.5 Da | 1    | <p>Compound name: PC_782.5<br/>                     Correlation coefficient: <math>r = 0.997218</math>, <math>r^2 = 0.994443</math><br/>                     Calibration curve: <math>1226.51 * x + -122120</math><br/>                     Response type: External Std, Area<br/>                     Curve type: Linear, Origin: Exclude, Weighting: 1/x, Axis trans: None</p> 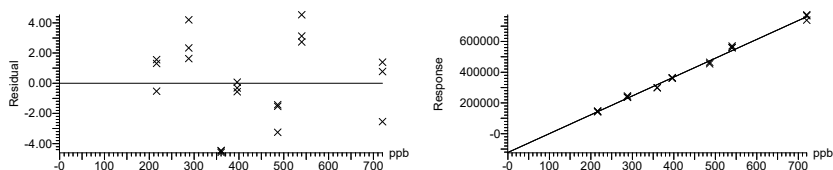                    |
|                            |                              | 2    | <p>Compound name: PC_782.5<br/>                     Correlation coefficient: <math>r = 0.997761</math>, <math>r^2 = 0.995526</math><br/>                     Calibration curve: <math>1131.64 * x + -154034</math><br/>                     Response type: External Std, Area<br/>                     Curve type: Linear, Origin: Exclude, Weighting: 1/x, Axis trans: None</p>                     |
|                            |                              | 3    | <p>Compound name: PC_782.5<br/>                     Correlation coefficient: <math>r = 0.990150</math>, <math>r^2 = 0.980398</math><br/>                     Calibration curve: <math>1362.81 * x + -179537</math><br/>                     Response type: External Std, Area<br/>                     Curve type: Linear, Origin: Exclude, Weighting: 1/x, Axis trans: None</p>                    |
|                            |                              | 1    | <p>Compound name: Digested hyaluronic acid<br/>                     Correlation coefficient: <math>r = 0.986828</math>, <math>r^2 = 0.973829</math><br/>                     Calibration curve: <math>6523.57 * x + -15392.9</math><br/>                     Response type: External Std, Area<br/>                     Curve type: Linear, Origin: Exclude, Weighting: 1/x, Axis trans: None</p>  |
|                            |                              | 2    | <p>Compound name: Digested hyaluronic acid<br/>                     Correlation coefficient: <math>r = 0.967398</math>, <math>r^2 = 0.935858</math><br/>                     Calibration curve: <math>4864.8 * x + 1886.82</math><br/>                     Response type: External Std, Area<br/>                     Curve type: Linear, Origin: Exclude, Weighting: 1/x, Axis trans: None</p>    |
|                            |                              | 3    | <p>Compound name: Digested hyaluronic acid<br/>                     Correlation coefficient: <math>r = 0.988969</math>, <math>r^2 = 0.978060</math><br/>                     Calibration curve: <math>3370.43 * x + -22997</math><br/>                     Response type: External Std, Area<br/>                     Curve type: Linear, Origin: Exclude, Weighting: 1/x, Axis trans: None</p>    |

Supplementary Table 8. Calibration curves and residual plots of all the quantified substances (continuation)

| Formulation                | Molecule        | Rep. | Residual plots and calibration curves                                                                                                                                                                                                                                                                                                                                                             |
|----------------------------|-----------------|------|---------------------------------------------------------------------------------------------------------------------------------------------------------------------------------------------------------------------------------------------------------------------------------------------------------------------------------------------------------------------------------------------------|
| SD-noPEG-HA (continuation) | Hyaluronic acid | 1    | <p>Compound name: Digested hyaluronic acid<br/>                     Correlation coefficient: <math>r = 0.992565</math>, <math>r^2 = 0.985185</math><br/>                     Calibration curve: <math>4404.76 * x + -14916.4</math><br/>                     Response type: External Std, Area<br/>                     Curve type: Linear, Origin: Exclude, Weighting: 1/x, Axis trans: None</p> |
|                            |                 | 2    | <p>Compound name: Digested hyaluronic acid<br/>                     Correlation coefficient: <math>r = 0.996035</math>, <math>r^2 = 0.992085</math><br/>                     Calibration curve: <math>4135.47 * x + -31361.2</math><br/>                     Response type: External Std, Area<br/>                     Curve type: Linear, Origin: Exclude, Weighting: 1/x, Axis trans: None</p> |
|                            |                 | 3    | <p>Compound name: Digested hyaluronic acid<br/>                     Correlation coefficient: <math>r = 0.993772</math>, <math>r^2 = 0.987583</math><br/>                     Calibration curve: <math>3391.73 * x + -39008.5</math><br/>                     Response type: External Std, Area<br/>                     Curve type: Linear, Origin: Exclude, Weighting: 1/x, Axis trans: None</p> |
|                            |                 | 1    | <p>Compound name: Digested hyaluronic acid<br/>                     Correlation coefficient: <math>r = 0.993810</math>, <math>r^2 = 0.987659</math><br/>                     Calibration curve: <math>5893.24 * x + 1224.65</math><br/>                     Response type: External Std, Area<br/>                     Curve type: Linear, Origin: Exclude, Weighting: 1/x, Axis trans: None</p>  |
|                            |                 | 2    | <p>Compound name: Digested hyaluronic acid<br/>                     Correlation coefficient: <math>r = 0.994331</math>, <math>r^2 = 0.988695</math><br/>                     Calibration curve: <math>4370.09 * x + -9223.01</math><br/>                     Response type: External Std, Area<br/>                     Curve type: Linear, Origin: Exclude, Weighting: 1/x, Axis trans: None</p> |
|                            |                 | 3    | <p>Compound name: Digested hyaluronic acid<br/>                     Correlation coefficient: <math>r = 0.991640</math>, <math>r^2 = 0.983349</math><br/>                     Calibration curve: <math>4115.71 * x + -21346.5</math><br/>                     Response type: External Std, Area<br/>                     Curve type: Linear, Origin: Exclude, Weighting: 1/x, Axis trans: None</p> |



Supplementary Table 8. Calibration curves and residual plots of all the quantified substances (continuation)

| Formulation  | Molecule | Rep.                  | Residual plots and calibration curves                                                                                                                                                                                                                                                                                                                                                              |   |                                                                                                                                                                                                                                                                                                                                                                                          |
|--------------|----------|-----------------------|----------------------------------------------------------------------------------------------------------------------------------------------------------------------------------------------------------------------------------------------------------------------------------------------------------------------------------------------------------------------------------------------------|---|------------------------------------------------------------------------------------------------------------------------------------------------------------------------------------------------------------------------------------------------------------------------------------------------------------------------------------------------------------------------------------------|
| SD-noPEG-PSA | CTAB     | 1                     | <p>Compound name: hexadecyltrimethylammonium<br/>                     Correlation coefficient: <math>r = 0.997990</math>, <math>r^2 = 0.995984</math><br/>                     Calibration curve: <math>3657.04 * x + 2984.29</math><br/>                     Response type: External Std, Area<br/>                     Curve type: Linear, Origin: Exclude, Weighting: 1/x, Axis trans: None</p> |   |                                                                                                                                                                                                                                                                                                                                                                                          |
|              |          | 2                     | <p>Compound name: hexadecyltrimethylammonium<br/>                     Correlation coefficient: <math>r = 0.998108</math>, <math>r^2 = 0.996219</math><br/>                     Calibration curve: <math>3114.3 * x + 39261.4</math><br/>                     Response type: External Std, Area<br/>                     Curve type: Linear, Origin: Exclude, Weighting: 1/x, Axis trans: None</p>  |   |                                                                                                                                                                                                                                                                                                                                                                                          |
|              |          | 3                     | <p>Compound name: hexadecyltrimethylammonium<br/>                     Correlation coefficient: <math>r = 0.996723</math>, <math>r^2 = 0.993458</math><br/>                     Calibration curve: <math>3447.94 * x + 20029.8</math><br/>                     Response type: External Std, Area<br/>                     Curve type: Linear, Origin: Exclude, Weighting: 1/x, Axis trans: None</p> |   |                                                                                                                                                                                                                                                                                                                                                                                          |
|              |          | C8-C8-C8 Triglyceride | C8-C8-C8 Triglyceride                                                                                                                                                                                                                                                                                                                                                                              | 1 | <p>Compound name: C8-C8-C8 TG<br/>                     Correlation coefficient: <math>r = 0.989550</math>, <math>r^2 = 0.979210</math><br/>                     Calibration curve: <math>1951.37 * x + 1.00607e+006</math><br/>                     Response type: External Std, Area<br/>                     Curve type: Linear, Origin: Exclude, Weighting: 1/x, Axis trans: None</p> |
|              |          |                       |                                                                                                                                                                                                                                                                                                                                                                                                    | 2 | <p>Compound name: C8-C8-C8 TG<br/>                     Correlation coefficient: <math>r = 0.990411</math>, <math>r^2 = 0.980914</math><br/>                     Calibration curve: <math>1452.6 * x + 1.77029e+006</math><br/>                     Response type: External Std, Area<br/>                     Curve type: Linear, Origin: Exclude, Weighting: 1/x, Axis trans: None</p>  |
|              |          |                       |                                                                                                                                                                                                                                                                                                                                                                                                    | 3 | <p>Compound name: C8-C8-C8 TG<br/>                     Correlation coefficient: <math>r = 0.992065</math>, <math>r^2 = 0.984193</math><br/>                     Calibration curve: <math>1676.78 * x + 1.24921e+006</math><br/>                     Response type: External Std, Area<br/>                     Curve type: Linear, Origin: Exclude, Weighting: 1/x, Axis trans: None</p> |

Supplementary Table 8. Calibration curves and residual plots of all the quantified substances (continuation)

| Formulation                 | Molecule                                                   | Rep. | Residual plots and calibration curves                                                                                                                                                                                                                                                                                                                                                   |                                                                                                                                                                                                                                                                                                                                                                                           |
|-----------------------------|------------------------------------------------------------|------|-----------------------------------------------------------------------------------------------------------------------------------------------------------------------------------------------------------------------------------------------------------------------------------------------------------------------------------------------------------------------------------------|-------------------------------------------------------------------------------------------------------------------------------------------------------------------------------------------------------------------------------------------------------------------------------------------------------------------------------------------------------------------------------------------|
| SD-noPEG-PSA (continuation) | C <sub>8</sub> -C <sub>8</sub> -C <sub>10</sub> glyceride  | 1    | Compound name: C <sub>8</sub> -C <sub>8</sub> -C <sub>10</sub> TG<br>Correlation coefficient: $r = 0.989462$ , $r^2 = 0.979035$<br>Calibration curve: $2163.78 * x + 1.20952e+006$<br>Response type: External Std, Area<br>Curve type: Linear, Origin: Exclude, Weighting: 1/x, Axis trans: None<br>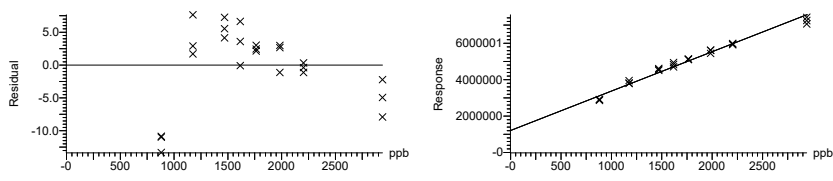  |                                                                                                                                                                                                                                                                                                                                                                                           |
|                             |                                                            | 2    | Compound name: C <sub>8</sub> -C <sub>8</sub> -C <sub>10</sub> TG<br>Correlation coefficient: $r = 0.990996$ , $r^2 = 0.982073$<br>Calibration curve: $1569.23 * x + 1.92218e+006$<br>Response type: External Std, Area<br>Curve type: Linear, Origin: Exclude, Weighting: 1/x, Axis trans: None<br>  |                                                                                                                                                                                                                                                                                                                                                                                           |
|                             |                                                            | 3    | Compound name: C <sub>8</sub> -C <sub>8</sub> -C <sub>10</sub> TG<br>Correlation coefficient: $r = 0.989581$ , $r^2 = 0.979271$<br>Calibration curve: $1854.36 * x + 1.51298e+006$<br>Response type: External Std, Area<br>Curve type: Linear, Origin: Exclude, Weighting: 1/x, Axis trans: None<br> |                                                                                                                                                                                                                                                                                                                                                                                           |
|                             | C <sub>8</sub> -C <sub>10</sub> -C <sub>10</sub> glyceride | Tri- | 1                                                                                                                                                                                                                                                                                                                                                                                       | Compound name: C <sub>8</sub> -C <sub>10</sub> -C <sub>10</sub> TG<br>Correlation coefficient: $r = 0.992471$ , $r^2 = 0.984999$<br>Calibration curve: $1534.99 * x + 593742$<br>Response type: External Std, Area<br>Curve type: Linear, Origin: Exclude, Weighting: 1/x, Axis trans: None<br>       |
|                             |                                                            |      | 2                                                                                                                                                                                                                                                                                                                                                                                       | Compound name: C <sub>8</sub> -C <sub>10</sub> -C <sub>10</sub> TG<br>Correlation coefficient: $r = 0.991897$ , $r^2 = 0.983860$<br>Calibration curve: $1112.18 * x + 1.04842e+006$<br>Response type: External Std, Area<br>Curve type: Linear, Origin: Exclude, Weighting: 1/x, Axis trans: None<br> |
|                             |                                                            |      | 3                                                                                                                                                                                                                                                                                                                                                                                       | Compound name: C <sub>8</sub> -C <sub>10</sub> -C <sub>10</sub> TG<br>Correlation coefficient: $r = 0.992729$ , $r^2 = 0.985511$<br>Calibration curve: $1274.23 * x + 866565$<br>Response type: External Std, Area<br>Curve type: Linear, Origin: Exclude, Weighting: 1/x, Axis trans: None<br>       |

Supplementary Table 8. Calibration curves and residual plots of all the quantified substances (continuation)

| Formulation                 | Molecule                                                        | Rep.                         | Residual plots and calibration curves                                                                                                                                                                                                                                                                                                                                                                                                                                      |   |                                                                                                                                                                                                                                                                                                                                                                                                                                                                        |
|-----------------------------|-----------------------------------------------------------------|------------------------------|----------------------------------------------------------------------------------------------------------------------------------------------------------------------------------------------------------------------------------------------------------------------------------------------------------------------------------------------------------------------------------------------------------------------------------------------------------------------------|---|------------------------------------------------------------------------------------------------------------------------------------------------------------------------------------------------------------------------------------------------------------------------------------------------------------------------------------------------------------------------------------------------------------------------------------------------------------------------|
| SD-noPEG-PSA (continuation) | C <sub>10</sub> -C <sub>10</sub> -C <sub>10</sub> Tri-glyceride | 1                            | <p>Compound name: C10-C10-C10 TG<br/>                     Correlation coefficient: <math>r = 0.978117</math>, <math>r^2 = 0.956712</math><br/>                     Calibration curve: <math>626.111 * x + -34775.9</math><br/>                     Response type: External Std, Area<br/>                     Curve type: Linear, Origin: Exclude, Weighting: 1/x, Axis trans: None</p> 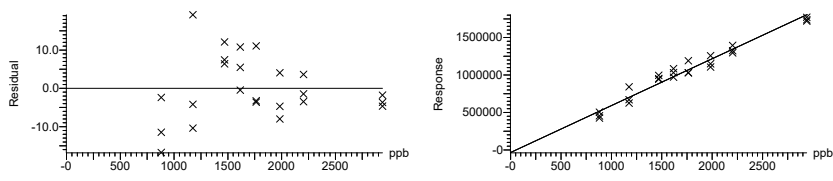 |   |                                                                                                                                                                                                                                                                                                                                                                                                                                                                        |
|                             |                                                                 | 2                            | <p>Compound name: C10-C10-C10 TG<br/>                     Correlation coefficient: <math>r = 0.981912</math>, <math>r^2 = 0.964152</math><br/>                     Calibration curve: <math>448.743 * x + 192818</math><br/>                     Response type: External Std, Area<br/>                     Curve type: Linear, Origin: Exclude, Weighting: 1/x, Axis trans: None</p>    |   |                                                                                                                                                                                                                                                                                                                                                                                                                                                                        |
|                             |                                                                 | 3                            | <p>Compound name: C10-C10-C10 TG<br/>                     Correlation coefficient: <math>r = 0.994138</math>, <math>r^2 = 0.988311</math><br/>                     Calibration curve: <math>480.788 * x + 180271</math><br/>                     Response type: External Std, Area<br/>                     Curve type: Linear, Origin: Exclude, Weighting: 1/x, Axis trans: None</p>   |   |                                                                                                                                                                                                                                                                                                                                                                                                                                                                        |
|                             |                                                                 | Phosphatidylcholine 756.6 Da | PC_756.5                                                                                                                                                                                                                                                                                                                                                                                                                                                                   | 1 | <p>Compound name: PC_756.5<br/>                     Correlation coefficient: <math>r = 0.981717</math>, <math>r^2 = 0.963769</math><br/>                     Calibration curve: <math>47.4852 * x + -7090.4</math><br/>                     Response type: External Std, Area<br/>                     Curve type: Linear, Origin: Exclude, Weighting: 1/x, Axis trans: None</p>   |
|                             |                                                                 |                              |                                                                                                                                                                                                                                                                                                                                                                                                                                                                            | 2 | <p>Compound name: PC_756.5<br/>                     Correlation coefficient: <math>r = 0.971896</math>, <math>r^2 = 0.944581</math><br/>                     Calibration curve: <math>43.2079 * x + -5281.14</math><br/>                     Response type: External Std, Area<br/>                     Curve type: Linear, Origin: Exclude, Weighting: 1/x, Axis trans: None</p>  |
|                             |                                                                 |                              |                                                                                                                                                                                                                                                                                                                                                                                                                                                                            | 3 | <p>Compound name: PC_756.5<br/>                     Correlation coefficient: <math>r = 0.986049</math>, <math>r^2 = 0.972293</math><br/>                     Calibration curve: <math>59.1599 * x + -6493.77</math><br/>                     Response type: External Std, Area<br/>                     Curve type: Linear, Origin: Exclude, Weighting: 1/x, Axis trans: None</p>  |

Supplementary Table 8. Calibration curves and residual plots of all the quantified substances (continuation)

| Formulation                 | Molecule                     | Rep. | Residual plots and calibration curves                                                                                                                                                                                                                                                                                                                                                                                                                                  |
|-----------------------------|------------------------------|------|------------------------------------------------------------------------------------------------------------------------------------------------------------------------------------------------------------------------------------------------------------------------------------------------------------------------------------------------------------------------------------------------------------------------------------------------------------------------|
| SD-noPEG-PSA (continuation) | Phosphatidylcholine 758.6 Da | 1    | <p>Compound name: PC_758.5<br/>                     Correlation coefficient: <math>r = 0.978454</math>, <math>r^2 = 0.957372</math><br/>                     Calibration curve: <math>360.953 * x + -52734.3</math><br/>                     Response type: External Std, Area<br/>                     Curve type: Linear, Origin: Exclude, Weighting: 1/x, Axis trans: None</p> 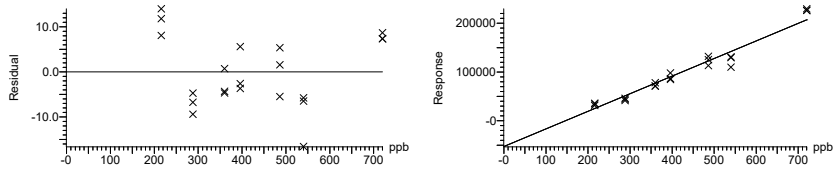   |
|                             |                              | 2    | <p>Compound name: PC_758.5<br/>                     Correlation coefficient: <math>r = 0.971378</math>, <math>r^2 = 0.943575</math><br/>                     Calibration curve: <math>341.841 * x + -39868.1</math><br/>                     Response type: External Std, Area<br/>                     Curve type: Linear, Origin: Exclude, Weighting: 1/x, Axis trans: None</p>    |
|                             |                              | 3    | <p>Compound name: PC_758.5<br/>                     Correlation coefficient: <math>r = 0.978576</math>, <math>r^2 = 0.957611</math><br/>                     Calibration curve: <math>482.411 * x + -49778.1</math><br/>                     Response type: External Std, Area<br/>                     Curve type: Linear, Origin: Exclude, Weighting: 1/x, Axis trans: None</p>   |
|                             |                              | 1    | <p>Compound name: PC_780.5<br/>                     Correlation coefficient: <math>r = 0.991907</math>, <math>r^2 = 0.983880</math><br/>                     Calibration curve: <math>191.822 * x + -28502.3</math><br/>                     Response type: External Std, Area<br/>                     Curve type: Linear, Origin: Exclude, Weighting: 1/x, Axis trans: None</p>  |
|                             |                              | 2    | <p>Compound name: PC_780.5<br/>                     Correlation coefficient: <math>r = 0.975548</math>, <math>r^2 = 0.951693</math><br/>                     Calibration curve: <math>162.687 * x + -19690.5</math><br/>                     Response type: External Std, Area<br/>                     Curve type: Linear, Origin: Exclude, Weighting: 1/x, Axis trans: None</p>  |
|                             |                              | 3    | <p>Compound name: PC_780.5<br/>                     Correlation coefficient: <math>r = 0.989517</math>, <math>r^2 = 0.979145</math><br/>                     Calibration curve: <math>219.467 * x + -25771.8</math><br/>                     Response type: External Std, Area<br/>                     Curve type: Linear, Origin: Exclude, Weighting: 1/x, Axis trans: None</p>  |

Supplementary Table 8. Calibration curves and residual plots of all the quantified substances (continuation)

| Formulation                 | Molecule                     | Rep.                    | Residual plots and calibration curves                                                                                                                                                                                                                                                                                                                                                                                                                                |   |                                                                                                                                                                                                                                                                                                                                                                                                                                                                                        |
|-----------------------------|------------------------------|-------------------------|----------------------------------------------------------------------------------------------------------------------------------------------------------------------------------------------------------------------------------------------------------------------------------------------------------------------------------------------------------------------------------------------------------------------------------------------------------------------|---|----------------------------------------------------------------------------------------------------------------------------------------------------------------------------------------------------------------------------------------------------------------------------------------------------------------------------------------------------------------------------------------------------------------------------------------------------------------------------------------|
| SD-noPEG-PSA (continuation) | Phosphatidylcholine 782.5 Da | 1                       | <p>Compound name: PC_782.5<br/>                     Correlation coefficient: <math>r = 0.982009</math>, <math>r^2 = 0.964341</math><br/>                     Calibration curve: <math>895.531 * x + -134281</math><br/>                     Response type: External Std, Area<br/>                     Curve type: Linear, Origin: Exclude, Weighting: 1/x, Axis trans: None</p> 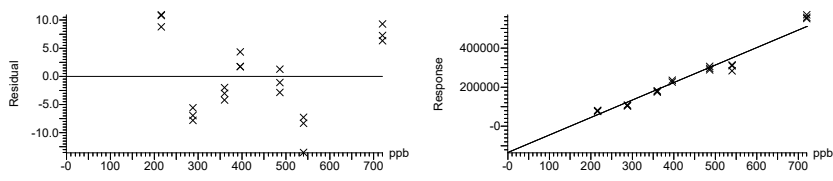  |   |                                                                                                                                                                                                                                                                                                                                                                                                                                                                                        |
|                             |                              | 2                       | <p>Compound name: PC_782.5<br/>                     Correlation coefficient: <math>r = 0.974672</math>, <math>r^2 = 0.949985</math><br/>                     Calibration curve: <math>815.527 * x + -100263</math><br/>                     Response type: External Std, Area<br/>                     Curve type: Linear, Origin: Exclude, Weighting: 1/x, Axis trans: None</p>   |   |                                                                                                                                                                                                                                                                                                                                                                                                                                                                                        |
|                             |                              | 3                       | <p>Compound name: PC_782.5<br/>                     Correlation coefficient: <math>r = 0.986556</math>, <math>r^2 = 0.973292</math><br/>                     Calibration curve: <math>1101.46 * x + -122320</math><br/>                     Response type: External Std, Area<br/>                     Curve type: Linear, Origin: Exclude, Weighting: 1/x, Axis trans: None</p>  |   |                                                                                                                                                                                                                                                                                                                                                                                                                                                                                        |
|                             |                              | Polysialic acid (whole) | acid                                                                                                                                                                                                                                                                                                                                                                                                                                                                 | 1 | <p>Compound name: Digested polysialic acid<br/>                     Correlation coefficient: <math>r = 0.984542</math>, <math>r^2 = 0.969323</math><br/>                     Calibration curve: <math>495.967 * x + -528.657</math><br/>                     Response type: External Std, Area<br/>                     Curve type: Linear, Origin: Exclude, Weighting: 1/x, Axis trans: None</p>  |
|                             |                              |                         |                                                                                                                                                                                                                                                                                                                                                                                                                                                                      | 2 | <p>Compound name: Digested polysialic acid<br/>                     Correlation coefficient: <math>r = 0.995783</math>, <math>r^2 = 0.991583</math><br/>                     Calibration curve: <math>474.707 * x + -2.33855</math><br/>                     Response type: External Std, Area<br/>                     Curve type: Linear, Origin: Exclude, Weighting: 1/x, Axis trans: None</p>  |
|                             |                              |                         |                                                                                                                                                                                                                                                                                                                                                                                                                                                                      | 3 | <p>Compound name: Digested polysialic acid<br/>                     Correlation coefficient: <math>r = 0.987737</math>, <math>r^2 = 0.975625</math><br/>                     Calibration curve: <math>477.285 * x + -592.32</math><br/>                     Response type: External Std, Area<br/>                     Curve type: Linear, Origin: Exclude, Weighting: 1/x, Axis trans: None</p>   |

Supplementary Table 8. Calibration curves and residual plots of all the quantified substances (continuation)

| Formulation                 | Molecule                      | Rep. | Residual plots and calibration curves                                                                                                                                                                                                                                                                                                                                                             |
|-----------------------------|-------------------------------|------|---------------------------------------------------------------------------------------------------------------------------------------------------------------------------------------------------------------------------------------------------------------------------------------------------------------------------------------------------------------------------------------------------|
| SD-noPEG-PSA (continuation) | Polysialic acid (supernatant) | 1    | <p>Compound name: Digested polysialic acid<br/>                     Correlation coefficient: <math>r = 0.996813</math>, <math>r^2 = 0.993635</math><br/>                     Calibration curve: <math>215.458 * x + -41.1843</math><br/>                     Response type: External Std, Area<br/>                     Curve type: Linear, Origin: Exclude, Weighting: 1/x, Axis trans: None</p> |
|                             |                               | 2    | <p>Compound name: Digested polysialic acid<br/>                     Correlation coefficient: <math>r = 0.991058</math>, <math>r^2 = 0.982196</math><br/>                     Calibration curve: <math>336.608 * x + -508.845</math><br/>                     Response type: External Std, Area<br/>                     Curve type: Linear, Origin: Exclude, Weighting: 1/x, Axis trans: None</p> |
|                             |                               | 3    | <p>Compound name: Digested polysialic acid<br/>                     Correlation coefficient: <math>r = 0.992138</math>, <math>r^2 = 0.984337</math><br/>                     Calibration curve: <math>278.905 * x + -449.887</math><br/>                     Response type: External Std, Area<br/>                     Curve type: Linear, Origin: Exclude, Weighting: 1/x, Axis trans: None</p> |
|                             |                               | 1    | <p>Compound name: Digested polysialic acid<br/>                     Correlation coefficient: <math>r = 0.998050</math>, <math>r^2 = 0.996104</math><br/>                     Calibration curve: <math>328.803 * x + 27.6584</math><br/>                     Response type: External Std, Area<br/>                     Curve type: Linear, Origin: Exclude, Weighting: 1/x, Axis trans: None</p>  |
|                             |                               | 2    | <p>Compound name: Digested polysialic acid<br/>                     Correlation coefficient: <math>r = 0.997997</math>, <math>r^2 = 0.995998</math><br/>                     Calibration curve: <math>441.915 * x + -248.6</math><br/>                     Response type: External Std, Area<br/>                     Curve type: Linear, Origin: Exclude, Weighting: 1/x, Axis trans: None</p>   |
|                             |                               | 3    | <p>Compound name: Digested polysialic acid<br/>                     Correlation coefficient: <math>r = 0.993285</math>, <math>r^2 = 0.986614</math><br/>                     Calibration curve: <math>352.887 * x + 329.055</math><br/>                     Response type: External Std, Area<br/>                     Curve type: Linear, Origin: Exclude, Weighting: 1/x, Axis trans: None</p>  |

Supplementary Table 8. Calibration curves and residual plots of all the quantified substances (continuation)

| Formulation          | Molecule     | Rep.                        | Residual plots and calibration curves                                                                                                                                                                                                                                                                                                                                                |   |                                                                                                                                                                                                                                                                                                                                                                                                     |
|----------------------|--------------|-----------------------------|--------------------------------------------------------------------------------------------------------------------------------------------------------------------------------------------------------------------------------------------------------------------------------------------------------------------------------------------------------------------------------------|---|-----------------------------------------------------------------------------------------------------------------------------------------------------------------------------------------------------------------------------------------------------------------------------------------------------------------------------------------------------------------------------------------------------|
| SE- <i>b</i> -PEG-HA | Benzethonium | 1                           | <p>Compound name: benzethonium<br/>                     Correlation coefficient: <math>r = 0.999809</math>, <math>r^2 = 0.999617</math><br/>                     Calibration curve: <math>20837.2 * x + 8846.54</math><br/>                     Response type: External Std, Area<br/>                     Curve type: Linear, Origin: Exclude, Weighting: 1/x, Axis trans: None</p> |   |                                                                                                                                                                                                                                                                                                                                                                                                     |
|                      |              | 2                           | <p>Compound name: benzethonium<br/>                     Correlation coefficient: <math>r = 0.999915</math>, <math>r^2 = 0.999830</math><br/>                     Calibration curve: <math>28497.7 * x + 9350.55</math><br/>                     Response type: External Std, Area<br/>                     Curve type: Linear, Origin: Exclude, Weighting: 1/x, Axis trans: None</p> |   |                                                                                                                                                                                                                                                                                                                                                                                                     |
|                      |              | 3                           | <p>Compound name: benzethonium<br/>                     Correlation coefficient: <math>r = 0.999769</math>, <math>r^2 = 0.999538</math><br/>                     Calibration curve: <math>21075.3 * x + 18948</math><br/>                     Response type: External Std, Area<br/>                     Curve type: Linear, Origin: Exclude, Weighting: 1/x, Axis trans: None</p>   |   |                                                                                                                                                                                                                                                                                                                                                                                                     |
|                      |              | Macrogol-15-hydroxystearate |                                                                                                                                                                                                                                                                                                                                                                                      | 1 | <p>Compound name: macrogol-15-hydroxystearate<br/>                     Correlation coefficient: <math>r = 0.999616</math>, <math>r^2 = 0.999233</math><br/>                     Calibration curve: <math>490.537 * x + 621.962</math><br/>                     Response type: External Std, Area<br/>                     Curve type: Linear, Origin: Exclude, Weighting: 1/x, Axis trans: None</p> |
|                      |              |                             |                                                                                                                                                                                                                                                                                                                                                                                      | 2 | <p>Compound name: macrogol-15-hydroxystearate<br/>                     Correlation coefficient: <math>r = 0.999613</math>, <math>r^2 = 0.999226</math><br/>                     Calibration curve: <math>552.297 * x + 1523.58</math><br/>                     Response type: External Std, Area<br/>                     Curve type: Linear, Origin: Exclude, Weighting: 1/x, Axis trans: None</p> |
|                      |              |                             |                                                                                                                                                                                                                                                                                                                                                                                      | 3 | <p>Compound name: macrogol-15-hydroxystearate<br/>                     Correlation coefficient: <math>r = 0.999533</math>, <math>r^2 = 0.999066</math><br/>                     Calibration curve: <math>492.173 * x + 1525.34</math><br/>                     Response type: External Std, Area<br/>                     Curve type: Linear, Origin: Exclude, Weighting: 1/x, Axis trans: None</p> |

Supplementary Table 8. Calibration curves and residual plots of all the quantified substances (continuation)

| Formulation                         | Molecule                                                    | Rep. | Residual plots and calibration curves                                                                                                                                                                                                                                                                                                                                                                                                                                       |
|-------------------------------------|-------------------------------------------------------------|------|-----------------------------------------------------------------------------------------------------------------------------------------------------------------------------------------------------------------------------------------------------------------------------------------------------------------------------------------------------------------------------------------------------------------------------------------------------------------------------|
| SE- <i>b</i> -PEG-HA (continuation) | Polysorbate 80                                              | 1    | <p>Compound name: polysorbate 80<br/>                     Correlation coefficient: <math>r = 0.999571</math>, <math>r^2 = 0.999142</math><br/>                     Calibration curve: <math>21.7494 * x + -5484.45</math><br/>                     Response type: External Std, Area<br/>                     Curve type: Linear, Origin: Exclude, Weighting: 1/x, Axis trans: None</p> 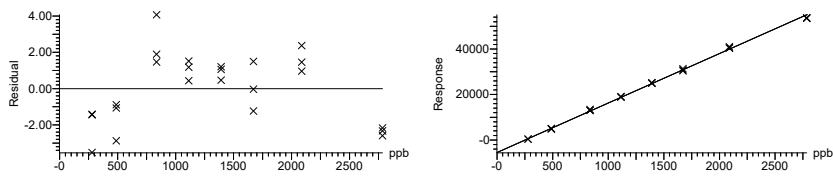  |
|                                     |                                                             | 2    | <p>Compound name: polysorbate 80<br/>                     Correlation coefficient: <math>r = 0.999600</math>, <math>r^2 = 0.999200</math><br/>                     Calibration curve: <math>27.0221 * x + -7565.95</math><br/>                     Response type: External Std, Area<br/>                     Curve type: Linear, Origin: Exclude, Weighting: 1/x, Axis trans: None</p>   |
|                                     |                                                             | 3    | <p>Compound name: polysorbate 80<br/>                     Correlation coefficient: <math>r = 0.999386</math>, <math>r^2 = 0.998773</math><br/>                     Calibration curve: <math>24.6304 * x + -4631.83</math><br/>                     Response type: External Std, Area<br/>                     Curve type: Linear, Origin: Exclude, Weighting: 1/x, Axis trans: None</p>  |
|                                     | C <sub>8</sub> -C <sub>8</sub> -C <sub>8</sub> Triglyceride | 1    | <p>Compound name: C8-C8-C8 TG<br/>                     Correlation coefficient: <math>r = 0.998555</math>, <math>r^2 = 0.997112</math><br/>                     Calibration curve: <math>1143.7 * x + 729914</math><br/>                     Response type: External Std, Area<br/>                     Curve type: Linear, Origin: Exclude, Weighting: 1/x, Axis trans: None</p>       |
|                                     |                                                             | 2    | <p>Compound name: C8-C8-C8 TG<br/>                     Correlation coefficient: <math>r = 0.996395</math>, <math>r^2 = 0.992802</math><br/>                     Calibration curve: <math>1161.24 * x + 857869</math><br/>                     Response type: External Std, Area<br/>                     Curve type: Linear, Origin: Exclude, Weighting: 1/x, Axis trans: None</p>      |
|                                     |                                                             | 3    | <p>Compound name: C8-C8-C8 TG<br/>                     Correlation coefficient: <math>r = 0.995926</math>, <math>r^2 = 0.991868</math><br/>                     Calibration curve: <math>1236.69 * x + 836793</math><br/>                     Response type: External Std, Area<br/>                     Curve type: Linear, Origin: Exclude, Weighting: 1/x, Axis trans: None</p>      |



Supplementary Table 8. Calibration curves and residual plots of all the quantified substances (continuation)

| Formulation                         | Molecule                                                  | Rep. | Residual plots and calibration curves                                                                                                                                                                                                                                                                                                                                                                                                                                        |
|-------------------------------------|-----------------------------------------------------------|------|------------------------------------------------------------------------------------------------------------------------------------------------------------------------------------------------------------------------------------------------------------------------------------------------------------------------------------------------------------------------------------------------------------------------------------------------------------------------------|
| SE- <i>b</i> -PEG-HA (continuation) | C <sub>8</sub> -C <sub>8</sub> -C <sub>10</sub> glyceride | 1    | <p>Compound name: C8-C8-C10 TG<br/>                     Correlation coefficient: <math>r = 0.995759</math>, <math>r^2 = 0.991536</math><br/>                     Calibration curve: <math>1340.75 * x + 1.08877e+006</math><br/>                     Response type: External Std, Area<br/>                     Curve type: Linear, Origin: Exclude, Weighting: 1/x, Axis trans: None</p> 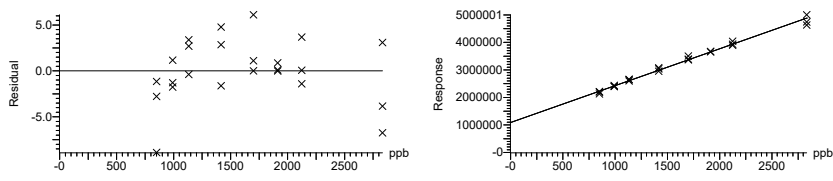 |
|                                     |                                                           | 2    | <p>Compound name: C8-C8-C10 TG<br/>                     Correlation coefficient: <math>r = 0.995234</math>, <math>r^2 = 0.990491</math><br/>                     Calibration curve: <math>1399.21 * x + 1.14637e+006</math><br/>                     Response type: External Std, Area<br/>                     Curve type: Linear, Origin: Exclude, Weighting: 1/x, Axis trans: None</p>  |
|                                     |                                                           | 3    | <p>Compound name: C8-C10-C10 TG<br/>                     Correlation coefficient: <math>r = 0.992999</math>, <math>r^2 = 0.986048</math><br/>                     Calibration curve: <math>1067.63 * x + 847138</math><br/>                     Response type: External Std, Area<br/>                     Curve type: Linear, Origin: Exclude, Weighting: 1/x, Axis trans: None</p>      |
|                                     |                                                           | 1    | <p>Compound name: C8-C10-C10 TG<br/>                     Correlation coefficient: <math>r = 0.995371</math>, <math>r^2 = 0.990763</math><br/>                     Calibration curve: <math>1042.33 * x + 675228</math><br/>                     Response type: External Std, Area<br/>                     Curve type: Linear, Origin: Exclude, Weighting: 1/x, Axis trans: None</p>     |
|                                     |                                                           | 2    | <p>Compound name: C8-C10-C10 TG<br/>                     Correlation coefficient: <math>r = 0.995793</math>, <math>r^2 = 0.991604</math><br/>                     Calibration curve: <math>987.866 * x + 787402</math><br/>                     Response type: External Std, Area<br/>                     Curve type: Linear, Origin: Exclude, Weighting: 1/x, Axis trans: None</p>     |
|                                     |                                                           | 3    | <p>Compound name: C8-C10-C10 TG<br/>                     Correlation coefficient: <math>r = 0.990811</math>, <math>r^2 = 0.981706</math><br/>                     Calibration curve: <math>1562.36 * x + 603095</math><br/>                     Response type: External Std, Area<br/>                     Curve type: Linear, Origin: Exclude, Weighting: 1/x, Axis trans: None</p>     |

Supplementary Table 8. Calibration curves and residual plots of all the quantified substances (continuation)

| Formulation                         | Molecule                                                    | Rep.                    | Residual plots and calibration curves                                                                                                                                                                                                                                                                                                                                                                                                                                     |   |                                                                                                                                                                                                                                                                                                                                                                                                                                                                                        |
|-------------------------------------|-------------------------------------------------------------|-------------------------|---------------------------------------------------------------------------------------------------------------------------------------------------------------------------------------------------------------------------------------------------------------------------------------------------------------------------------------------------------------------------------------------------------------------------------------------------------------------------|---|----------------------------------------------------------------------------------------------------------------------------------------------------------------------------------------------------------------------------------------------------------------------------------------------------------------------------------------------------------------------------------------------------------------------------------------------------------------------------------------|
| SE- <i>b</i> -PEG-HA (continuation) | C <sub>10</sub> -C <sub>10</sub> -C <sub>10</sub> glyceride | 1                       | <p>Compound name: C10-C10-C10 TG<br/>                     Correlation coefficient: <math>r = 0.995952</math>, <math>r^2 = 0.991921</math><br/>                     Calibration curve: <math>422.591 * x + 167207</math><br/>                     Response type: External Std, Area<br/>                     Curve type: Linear, Origin: Exclude, Weighting: 1/x, Axis trans: None</p> 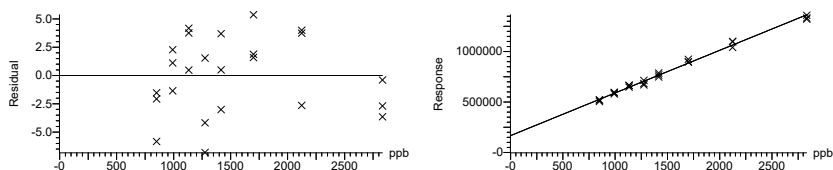  |   |                                                                                                                                                                                                                                                                                                                                                                                                                                                                                        |
|                                     |                                                             | 2                       | <p>Compound name: C10-C10-C10 TG<br/>                     Correlation coefficient: <math>r = 0.991788</math>, <math>r^2 = 0.983644</math><br/>                     Calibration curve: <math>420.378 * x + 185286</math><br/>                     Response type: External Std, Area<br/>                     Curve type: Linear, Origin: Exclude, Weighting: 1/x, Axis trans: None</p>   |   |                                                                                                                                                                                                                                                                                                                                                                                                                                                                                        |
|                                     |                                                             | 3                       | <p>Compound name: C10-C10-C10 TG<br/>                     Correlation coefficient: <math>r = 0.990394</math>, <math>r^2 = 0.980880</math><br/>                     Calibration curve: <math>452.742 * x + 206773</math><br/>                     Response type: External Std, Area<br/>                     Curve type: Linear, Origin: Exclude, Weighting: 1/x, Axis trans: None</p>  |   |                                                                                                                                                                                                                                                                                                                                                                                                                                                                                        |
|                                     |                                                             | Hyaluronic acid (whole) | acid                                                                                                                                                                                                                                                                                                                                                                                                                                                                      | 1 | <p>Compound name: Digested hyaluronic acid<br/>                     Correlation coefficient: <math>r = 0.993235</math>, <math>r^2 = 0.986517</math><br/>                     Calibration curve: <math>4187.56 * x + -16548</math><br/>                     Response type: External Std, Area<br/>                     Curve type: Linear, Origin: Exclude, Weighting: 1/x, Axis trans: None</p>    |
|                                     |                                                             |                         |                                                                                                                                                                                                                                                                                                                                                                                                                                                                           | 2 | <p>Compound name: Digested hyaluronic acid<br/>                     Correlation coefficient: <math>r = 0.992919</math>, <math>r^2 = 0.985888</math><br/>                     Calibration curve: <math>5760.23 * x + -22313.5</math><br/>                     Response type: External Std, Area<br/>                     Curve type: Linear, Origin: Exclude, Weighting: 1/x, Axis trans: None</p>  |
|                                     |                                                             |                         |                                                                                                                                                                                                                                                                                                                                                                                                                                                                           | 3 | <p>Compound name: Digested hyaluronic acid<br/>                     Correlation coefficient: <math>r = 0.993213</math>, <math>r^2 = 0.986472</math><br/>                     Calibration curve: <math>5010.39 * x + -12794.7</math><br/>                     Response type: External Std, Area<br/>                     Curve type: Linear, Origin: Exclude, Weighting: 1/x, Axis trans: None</p>  |

Supplementary Table 8. Calibration curves and residual plots of all the quantified substances (continuation)

| Formulation                         | Molecule                    | Rep. | Residual plots and calibration curves                                                                                                                                                                                                                                                                                                                                                             |
|-------------------------------------|-----------------------------|------|---------------------------------------------------------------------------------------------------------------------------------------------------------------------------------------------------------------------------------------------------------------------------------------------------------------------------------------------------------------------------------------------------|
| SE- <i>b</i> -PEG-HA (continuation) | Hyaluronic acid (retentate) | 1    | <p>Compound name: Digested hyaluronic acid<br/>                     Correlation coefficient: <math>r = 0.984484</math>, <math>r^2 = 0.969209</math><br/>                     Calibration curve: <math>2948.95 * x + -7474</math><br/>                     Response type: External Std, Area<br/>                     Curve type: Linear, Origin: Exclude, Weighting: 1/x, Axis trans: None</p>    |
|                                     |                             | 2    | <p>Compound name: Digested hyaluronic acid<br/>                     Correlation coefficient: <math>r = 0.990093</math>, <math>r^2 = 0.980285</math><br/>                     Calibration curve: <math>3985.69 * x + -7849.32</math><br/>                     Response type: External Std, Area<br/>                     Curve type: Linear, Origin: Exclude, Weighting: 1/x, Axis trans: None</p> |
|                                     |                             | 3    | <p>Compound name: Digested hyaluronic acid<br/>                     Correlation coefficient: <math>r = 0.973670</math>, <math>r^2 = 0.948034</math><br/>                     Calibration curve: <math>3972.57 * x + -8904.86</math><br/>                     Response type: External Std, Area<br/>                     Curve type: Linear, Origin: Exclude, Weighting: 1/x, Axis trans: None</p> |
|                                     |                             | 1    | <p>Compound name: Digested hyaluronic acid<br/>                     Correlation coefficient: <math>r = 0.990870</math>, <math>r^2 = 0.981823</math><br/>                     Calibration curve: <math>2674.08 * x + -9315.04</math><br/>                     Response type: External Std, Area<br/>                     Curve type: Linear, Origin: Exclude, Weighting: 1/x, Axis trans: None</p> |
|                                     |                             | 2    | <p>Compound name: Digested hyaluronic acid<br/>                     Correlation coefficient: <math>r = 0.996754</math>, <math>r^2 = 0.993519</math><br/>                     Calibration curve: <math>2756.76 * x + -7074.99</math><br/>                     Response type: External Std, Area<br/>                     Curve type: Linear, Origin: Exclude, Weighting: 1/x, Axis trans: None</p> |
|                                     |                             | 3    | <p>Compound name: Digested hyaluronic acid<br/>                     Correlation coefficient: <math>r = 0.996494</math>, <math>r^2 = 0.993000</math><br/>                     Calibration curve: <math>2247.5 * x + -6382.66</math><br/>                     Response type: External Std, Area<br/>                     Curve type: Linear, Origin: Exclude, Weighting: 1/x, Axis trans: None</p>  |

Supplementary Table 8. Calibration curves and residual plots of all the quantified substances (continuation)

| Formulation          | Molecule                 | Rep.  | Residual plots and calibration curves                                                                                                                                                                                                                                                                                                                                                                                                                                                          |   |                                                                                                                                                                                                                                                                                                                                                                                                                                                                                                      |
|----------------------|--------------------------|-------|------------------------------------------------------------------------------------------------------------------------------------------------------------------------------------------------------------------------------------------------------------------------------------------------------------------------------------------------------------------------------------------------------------------------------------------------------------------------------------------------|---|------------------------------------------------------------------------------------------------------------------------------------------------------------------------------------------------------------------------------------------------------------------------------------------------------------------------------------------------------------------------------------------------------------------------------------------------------------------------------------------------------|
| SD-noPEG-<br>PEG-PGA | DL- $\alpha$ -tocopherol | 1     | <p>Compound name: DL-<math>\alpha</math>-tocopherol<br/>                     Correlation coefficient: <math>r = 0.997469</math>, <math>r^2 = 0.994945</math><br/>                     Calibration curve: <math>49.4472 * x + -3461.7</math><br/>                     Response type: External Std, Area<br/>                     Curve type: Linear, Origin: Exclude, Weighting: 1/x, Axis trans: None</p> 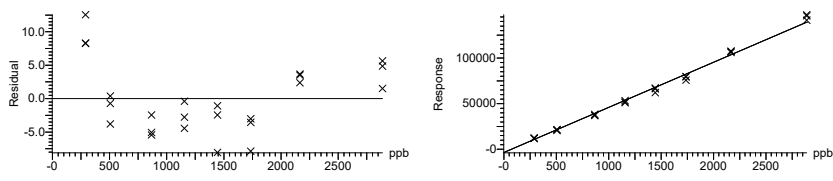   |   |                                                                                                                                                                                                                                                                                                                                                                                                                                                                                                      |
|                      |                          | 2     | <p>Compound name: DL-<math>\alpha</math>-tocopherol<br/>                     Correlation coefficient: <math>r = 0.998434</math>, <math>r^2 = 0.996871</math><br/>                     Calibration curve: <math>46.7148 * x + -2340.53</math><br/>                     Response type: External Std, Area<br/>                     Curve type: Linear, Origin: Exclude, Weighting: 1/x, Axis trans: None</p>   |   |                                                                                                                                                                                                                                                                                                                                                                                                                                                                                                      |
|                      |                          | 3     | <p>Compound name: DL-<math>\alpha</math>-tocopherol<br/>                     Correlation coefficient: <math>r = 0.997046</math>, <math>r^2 = 0.994100</math><br/>                     Calibration curve: <math>48.3276 * x + -3138.24</math><br/>                     Response type: External Std, Area<br/>                     Curve type: Linear, Origin: Exclude, Weighting: 1/x, Axis trans: None</p>  |   |                                                                                                                                                                                                                                                                                                                                                                                                                                                                                                      |
|                      |                          | DOTAP | 1,2-dioleoyl-3-trimethylammoniumpropane                                                                                                                                                                                                                                                                                                                                                                                                                                                        | 1 | <p>Compound name: 1,2-dioleoyl-3-trimethylammoniumpropane<br/>                     Correlation coefficient: <math>r = 0.999393</math>, <math>r^2 = 0.998787</math><br/>                     Calibration curve: <math>1851.7 * x + -1312.06</math><br/>                     Response type: External Std, Area<br/>                     Curve type: Linear, Origin: Exclude, Weighting: 1/x, Axis trans: None</p>  |
|                      |                          |       |                                                                                                                                                                                                                                                                                                                                                                                                                                                                                                | 2 | <p>Compound name: 1,2-dioleoyl-3-trimethylammoniumpropane<br/>                     Correlation coefficient: <math>r = 0.999553</math>, <math>r^2 = 0.999106</math><br/>                     Calibration curve: <math>1673.68 * x + 86.2758</math><br/>                     Response type: External Std, Area<br/>                     Curve type: Linear, Origin: Exclude, Weighting: 1/x, Axis trans: None</p>  |
|                      |                          |       |                                                                                                                                                                                                                                                                                                                                                                                                                                                                                                | 3 | <p>Compound name: 1,2-dioleoyl-3-trimethylammoniumpropane<br/>                     Correlation coefficient: <math>r = 0.998635</math>, <math>r^2 = 0.997271</math><br/>                     Calibration curve: <math>1530.23 * x + 253.64</math><br/>                     Response type: External Std, Area<br/>                     Curve type: Linear, Origin: Exclude, Weighting: 1/x, Axis trans: None</p>   |

Supplementary Table 8. Calibration curves and residual plots of all the quantified substances (continuation)

| Formulation                            | Molecule                      | Rep. | Residual plots and calibration curves                                                                                                                                                                                                                                                                                                                                                                                   |
|----------------------------------------|-------------------------------|------|-------------------------------------------------------------------------------------------------------------------------------------------------------------------------------------------------------------------------------------------------------------------------------------------------------------------------------------------------------------------------------------------------------------------------|
| SD-noPEG-<br>PEG-PGA<br>(continuation) | PEG-PGA<br>(whole)            | 1    | <p>Compound name: Digested polyethylene glycol polyglutamic acid<br/>                     Correlation coefficient: <math>r = 0.998487</math>, <math>r^2 = 0.996977</math><br/>                     Calibration curve: <math>10575.9 * x + -30283.5</math><br/>                     Response type: External Std, Area<br/>                     Curve type: Linear, Origin: Exclude, Weighting: 1/x, Axis trans: None</p> |
|                                        |                               | 2    | <p>Compound name: Digested polyethylene glycol polyglutamic acid<br/>                     Correlation coefficient: <math>r = 0.999504</math>, <math>r^2 = 0.999009</math><br/>                     Calibration curve: <math>7449.11 * x + 22416.1</math><br/>                     Response type: External Std, Area<br/>                     Curve type: Linear, Origin: Exclude, Weighting: 1/x, Axis trans: None</p>  |
|                                        |                               | 3    | <p>Compound name: Digested polyethylene glycol polyglutamic acid<br/>                     Correlation coefficient: <math>r = 0.998669</math>, <math>r^2 = 0.997340</math><br/>                     Calibration curve: <math>8812.53 * x + -7182.38</math><br/>                     Response type: External Std, Area<br/>                     Curve type: Linear, Origin: Exclude, Weighting: 1/x, Axis trans: None</p> |
| PEG-PGA<br>(su-<br>pernatant)          | PEG-PGA<br>(su-<br>pernatant) | 1    | <p>Compound name: Digested polyethylene glycol polyglutamic acid<br/>                     Correlation coefficient: <math>r = 0.998201</math>, <math>r^2 = 0.996404</math><br/>                     Calibration curve: <math>9707.07 * x + 13837.7</math><br/>                     Response type: External Std, Area<br/>                     Curve type: Linear, Origin: Exclude, Weighting: 1/x, Axis trans: None</p>  |
|                                        |                               | 2    | <p>Compound name: Digested polyethylene glycol polyglutamic acid<br/>                     Correlation coefficient: <math>r = 0.999767</math>, <math>r^2 = 0.999534</math><br/>                     Calibration curve: <math>7914.54 * x + 12392.4</math><br/>                     Response type: External Std, Area<br/>                     Curve type: Linear, Origin: Exclude, Weighting: 1/x, Axis trans: None</p>  |
|                                        |                               | 3    | <p>Compound name: Digested polyethylene glycol polyglutamic acid<br/>                     Correlation coefficient: <math>r = 0.998509</math>, <math>r^2 = 0.997020</math><br/>                     Calibration curve: <math>7881.39 * x + 20487.5</math><br/>                     Response type: External Std, Area<br/>                     Curve type: Linear, Origin: Exclude, Weighting: 1/x, Axis trans: None</p>  |

Supplementary Table 8. Calibration curves and residual plots of all the quantified substances (continuation)

| Formulation                     | Molecule                | Rep. | Residual plots and calibration curves                                                                                                                                                                                                                                                                                                                                                                                  |
|---------------------------------|-------------------------|------|------------------------------------------------------------------------------------------------------------------------------------------------------------------------------------------------------------------------------------------------------------------------------------------------------------------------------------------------------------------------------------------------------------------------|
| SD-noPEG-PEG-PGA (continuation) | PEG-PGA (in-franantant) | 1    | <p>Compound name: Digested polyethylene glycol polyglutamic acid<br/>                     Correlation coefficient: <math>r = 0.998736</math>, <math>r^2 = 0.997474</math><br/>                     Calibration curve: <math>11304.1 * x + 8801.48</math><br/>                     Response type: External Std, Area<br/>                     Curve type: Linear, Origin: Exclude, Weighting: 1/x, Axis trans: None</p> |
|                                 |                         | 2    | <p>Compound name: Digested polyethylene glycol polyglutamic acid<br/>                     Correlation coefficient: <math>r = 0.999069</math>, <math>r^2 = 0.998139</math><br/>                     Calibration curve: <math>8114.2 * x + 3596.93</math><br/>                     Response type: External Std, Area<br/>                     Curve type: Linear, Origin: Exclude, Weighting: 1/x, Axis trans: None</p>  |
|                                 |                         | 3    | <p>Compound name: Digested polyethylene glycol polyglutamic acid<br/>                     Correlation coefficient: <math>r = 0.999902</math>, <math>r^2 = 0.999803</math><br/>                     Calibration curve: <math>8230.45 * x + 11492.7</math><br/>                     Response type: External Std, Area<br/>                     Curve type: Linear, Origin: Exclude, Weighting: 1/x, Axis trans: None</p> |

SD-*l*-PEG-HA: lineal-polyethylene glycol-containing hyaluronic acid nanocapsules formulated by solvent displacement. SD-noPEG-HA: non-PEGylated hyaluronic acid nanocapsules formulated by solvent displacement. SD-noPEG-PSA: non-PEGylated polysialic acid nanocapsules formulated by solvent displacement. SE-*b*-PEG-HA: Self-emulsifying branched-polyethylene glycol-containing hyaluronic acid nanocapsules. SD-noPEG-PEG-PGA: Solvent displacement nanocapsules not containing PEGylated surfactants and with an outer shell of polyethylene glycol polyglutamic acid. Residuals were plotted as percentual relative residuals (%RRES) vs. concentration, while calibration curves, response vs. concentration. In both cases, a weighting factor of 1/x was applied. In all cases, the mean of the triplicates of the %RRES for each concentration level was found to be in the range of -20 % to 20 %, confirming the linearity of the calibration curve. In general, residuals followed a random distribution around the value %RRES = 0. Rep.: replicates.

Supplementary Table 9. Mass percentage detected in each fraction relative to the theoretical amount added to the formulation

| Formulation          | Substance                                                      | Recovery before isolation (%) | Supernatant / re-tentate (%) | Infranatant/perme-ate recovery (%) | Sum of the fractions' recoveries (%) |
|----------------------|----------------------------------------------------------------|-------------------------------|------------------------------|------------------------------------|--------------------------------------|
| SD- <i>l</i> -PEG-HA | Benzethonium                                                   | 92 ± 10                       | 39 ± 5                       | 56 ± 4                             | 95 ± 9                               |
|                      | DL- $\alpha$ -tocopherol                                       | 106 ± 10                      | 72 ± 5                       | 30 ± 5                             | 102 ± 10                             |
|                      | D- $\alpha$ -tocopherol polyethylene glycol 1000 succinate     | 103 ± 10                      | 58 ± 6                       | 43 ± 6                             | 101 ± 12                             |
|                      | Hyaluronic acid                                                | 100 ± 5                       | 18 ± 3                       | 86 ± 2                             | 104 ± 5                              |
| SD-noPEG-HA          | Hexadecyltrimethylammonium                                     | 99 ± 19                       | 35 ± 8                       | 42 ± 9                             | 77 ± 16                              |
|                      | C <sub>8</sub> -C <sub>8</sub> -C <sub>8</sub> Triglyceride    | 113 ± 8                       | 52 ± 3                       | 24 ± 3                             | 75 ± 6                               |
|                      | C <sub>8</sub> -C <sub>8</sub> -C <sub>10</sub> Triglyceride   | 109 ± 7                       | 53 ± 4                       | 25 ± 4                             | 78 ± 7                               |
|                      | C <sub>8</sub> -C <sub>10</sub> -C <sub>10</sub> Triglyceride  | 109 ± 8                       | 53 ± 4                       | 24 ± 4                             | 77 ± 7                               |
|                      | C <sub>10</sub> -C <sub>10</sub> -C <sub>10</sub> Triglyceride | 110 ± 10                      | 54 ± 5                       | 23 ± 4                             | 77 ± 9                               |
|                      | Phosphatidylcholine 756.5 Da                                   | 96 ± 14                       | 16 ± 3                       | 27 ± 9                             | 43 ± 11                              |
|                      | Phosphatidylcholine 758.5 Da                                   | 98 ± 18                       | 16 ± 3                       | 27 ± 9                             | 43 ± 12                              |
|                      | Phosphatidylcholine 780.5 Da                                   | 97 ± 12                       | 16 ± 3                       | 25 ± 10                            | 42 ± 13                              |
|                      | Phosphatidylcholine 782.5 Da                                   | 97 ± 14                       | 16 ± 3                       | 27 ± 9                             | 44 ± 12                              |
|                      | Hyaluronic acid                                                | 105 ± 7                       | 14 ± 2                       | 80 ± 7                             | 95 ± 8                               |
| SD-noPEG-PSA         | Hexadecyltrimethylammonium                                     | 103 ± 11                      | 31 ± 4                       | 59 ± 6                             | 90 ± 9                               |
|                      | C <sub>8</sub> -C <sub>8</sub> -C <sub>8</sub> Triglyceride    | 101 ± 10                      | 68 ± 8                       | 28 ± 5                             | 95 ± 13                              |
|                      | C <sub>8</sub> -C <sub>8</sub> -C <sub>10</sub> Triglyceride   | 100 ± 12                      | 66 ± 8                       | 28 ± 5                             | 94 ± 13                              |
|                      | C <sub>8</sub> -C <sub>10</sub> -C <sub>10</sub> Triglyceride  | 99 ± 11                       | 66 ± 8                       | 28 ± 4                             | 94 ± 13                              |
|                      | C <sub>10</sub> -C <sub>10</sub> -C <sub>10</sub> Triglyceride | 98 ± 12                       | 64 ± 7                       | 30 ± 5                             | 94 ± 12                              |
|                      | Phosphatidylcholine 756.5 Da                                   | 96 ± 8                        | 17 ± 3                       | 40 ± 8                             | 57 ± 11                              |
|                      | Phosphatidylcholine 758.5 Da                                   | 94 ± 9                        | 18 ± 3                       | 40 ± 8                             | 58 ± 11                              |
|                      | Phosphatidylcholine 780.5 Da                                   | 98 ± 9                        | 18 ± 2                       | 41 ± 9                             | 59 ± 11                              |
|                      | Phosphatidylcholine 782.5 Da                                   | 97 ± 7                        | 17 ± 3                       | 40 ± 8                             | 58 ± 11                              |
|                      | Polysialic acid                                                | 103 ± 2                       | 14 ± 1                       | 91 ± 3                             | 104 ± 4                              |
| SE- <i>b</i> -PEG-HA | Polyethylene glycol                                            | 103 ± 9                       | < 10                         | 96 ± 13                            | N/A                                  |
|                      | Benzethonium                                                   | 109 ± 4                       | 51 ± 12                      | 51 ± 8                             | 102 ± 20                             |
|                      | Macrogol-15-hydroxystearate                                    | 99 ± 6                        | 39 ± 5                       | 54 ± 11                            | 93 ± 16                              |
|                      | Polysorbate 80                                                 | 111 ± 4                       | 24 ± 9                       | 63 ± 6                             | 87 ± 15                              |
|                      | C <sub>8</sub> -C <sub>8</sub> -C <sub>8</sub> Triglyceride    | 106 ± 5                       | 95 ± 7                       | < 10                               | N/A                                  |
|                      | C <sub>8</sub> -C <sub>8</sub> -C <sub>10</sub> Triglyceride   | 108 ± 6                       | 95 ± 6                       | < 10                               | N/A                                  |
|                      | C <sub>8</sub> -C <sub>10</sub> -C <sub>10</sub> Triglyceride  | 107 ± 6                       | 94 ± 6                       | < 10                               | N/A                                  |
|                      | C <sub>10</sub> -C <sub>10</sub> -C <sub>10</sub> Triglyceride | 104 ± 10                      | 89 ± 8                       | < 10                               | N/A                                  |
|                      | Hyaluronic acid                                                | 91 ± 3                        | 43 ± 4                       | 53 ± 3                             | 96 ± 7                               |
|                      | DL- $\alpha$ -tocopherol                                       | 96 ± 4                        | 95 ± 6                       | 9 ± 3                              | 103 ± 8                              |
| SD-noPEG-PEG-PGA     | 1,2-dioleoyl-3-trimethylammoniumpropane                        | 84 ± 8                        | 89 ± 3                       | 12 ± 3                             | 101 ± 6                              |
|                      | PEG-PGA                                                        | 109 ± 11                      | 34 ± 9                       | 67 ± 5                             | 101 ± 15                             |

SD-*l*-PEG-HA: lineal-polyethylene glycol-containing hyaluronic acid nanocapsules formulated by solvent displacement. SD-noPEG-HA: non-PEGylated hyaluronic acid nanocapsules formulated by solvent displacement. SD-noPEG-PSA: non-PEGylated polysialic acid nanocapsules formulated by solvent displacement. SE-*b*-PEG-HA: Self-emulsifying branched-polyethylene glycol-containing hyaluronic acid nanocapsules. N/A: not applicable. n = 3. Data are shown as mean ± standard deviation.

## Supplementary Bibliography

- (1) Inoue, T.; Tatemori, S.; Muranaka, N.; Hirahara, Y.; Homma, S.; Nakane, T.; Takano, A.; Nomi, Y.; Otsuka, Y. The Identification of Vitamin e Homologues in Medicinal Plant Samples Using ESI(+)-LC-MS3. *J. Agric. Food Chem.* **2012**, *60* (38), 9581–9588. <https://doi.org/10.1021/jf302425z>.
- (2) Jiang, K.; Gachumi, G.; Poudel, A.; Shurmer, B.; Bashir, Z.; El-Aneedy, A. The Establishment of Tandem Mass Spectrometric Fingerprints of Phytosterols and Tocopherols and the Development of Targeted Profiling Strategies in Vegetable Oils. *J. Am. Soc. Mass Spectrom.* **2019**, *30* (9), 1700–1712. <https://doi.org/10.1007/s13361-019-02242-2>.
- (3) LeBouf, R. F.; Virji, M. A.; Ranpara, A.; Stefaniak, A. B. Air and Surface Sampling Method for Assessing Exposures to Quaternary Ammonium Compounds Using Liquid Chromatography Tandem Mass Spectrometry. *Ann. Work Expo. Heal.* **2017**, *61* (6), 724–736. <https://doi.org/10.1093/annweh/wxx037>.
- (4) Dang, H.; Liu, D.; Hou, X.; Wu, Y.; Wang, B.; Dong, H.; Xian, Y. One-Step Extraction Prior to Two-Step Detection by Ultra High Performance Liquid Chromatography Tandem Mass Spectrometry (UHPLC-MS/MS) to Determine Different Groups of Antibacterial Agents in Infant Disposable Hygiene Products. *Anal. Methods* **2017**, *9* (3), 482–489. <https://doi.org/10.1039/c6ay03220f>.
- (5) Heyde, B. J.; Barthel, A.; Siemens, J.; Mulder, I. A Fast and Robust Method for the Extraction and Analysis of Quaternary Alkyl Ammonium Compounds from Soil and Sewage Sludge. *PLoS One* **2020**, *15* (8 August), 1–16. <https://doi.org/10.1371/journal.pone.0237020>.
- (6) Koeber, R.; Pappas, A.; Michaelis, U.; Schulze, B. Extraction and Quantification of the Cationic Lipid 1,2-Dioleoyl-3-Trimethylammonium Propane from Human Plasma. *Anal. Biochem.* **2007**, *363* (1), 157–159. <https://doi.org/10.1016/j.ab.2007.01.001>.
- (7) McAnoy, A. M.; Wu, C. C.; Murphy, R. C. Direct Qualitative Analysis of Triacylglycerols by Electrospray Mass Spectrometry Using a Linear Ion Trap. *J. Am. Soc. Mass Spectrom.* **2005**, *16* (9), 1498–1509. <https://doi.org/10.1016/j.jasms.2005.04.017>.
- (8) Molloy, B. J. LipidQuan-R for Diacyl-Phosphatidylcholines in Human Serum: A Rapid, Targeted UPLC-MS/MS Method for Lipidomic Research Studies. **2018**, 1–6.
- (9) Bhaskar, V. V.; Middha, A.; Srivastava, P.; Rajagopal, S. Liquid Chromatography/Tandem Mass Spectrometry Method for Quantitative Estimation of Solutol HS15 and Its Applications. *J. Pharm. Anal.* **2015**, *5* (2), 120–129. <https://doi.org/10.1016/j.jpba.2014.09.002>.
- (10) Hvattum, E.; Yip, W. L.; Grace, D.; Dyrstad, K. Characterization of Polysorbate 80 with Liquid Chromatography Mass Spectrometry and Nuclear Magnetic Resonance Spectroscopy: Specific Determination of Oxidation Products of Thermally Oxidized Polysorbate 80. *J. Pharm. Biomed. Anal.* **2012**, *62*, 7–16. <https://doi.org/10.1016/j.jpba.2011.12.009>.
- (11) Kühn, A. V.; Raith, K.; Sauerland, V.; Neubert, R. H. H. Quantification of Hyaluronic Acid Fragments in Pharmaceutical Formulations Using LC-ESI-MS. *J. Pharm. Biomed. Anal.* **2003**, *30* (5), 1531–1537. [https://doi.org/10.1016/S0731-7085\(02\)00544-7](https://doi.org/10.1016/S0731-7085(02)00544-7).
- (12) Vigliano, M.; Bianchera, A.; Bettini, R.; Elviri, L. Determination of Hyaluronic Acid in a Chitosan-Based Formulation by RP C18 and HILIC LC-ESI-MS: An Evaluation of Matrix Effect. *Chromatographia* **2013**, *76* (23–24), 1761–1766. <https://doi.org/10.1007/s10337-013-2533-4>.
- (13) Stern, R.; Kogan, G.; Jedrzejewski, M. J.; Šoltés, L. The Many Ways to Cleave Hyaluronan. *Biotechnol. Adv.* **2007**, *25* (6), 537–557. <https://doi.org/10.1016/j.biotechadv.2007.07.001>.
- (14) Toghi Eshghi, S.; Yang, W.; Hu, Y.; Shah, P.; Sun, S.; Li, X.; Zhang, H. Classification of Tandem Mass Spectra for Identification of N- and O-Linked Glycopeptides. *Sci. Rep.* **2016**, *6* (November), 1–8. <https://doi.org/10.1038/srep37189>.
- (15) Jiang, H.; Desaire, H.; Butnev, V. Y.; Bousfield, G. R. Glycoprotein Profiling by Electrospray Mass Spectrometry. *J. Am. Soc. Mass Spectrom.* **2004**, *15* (5), 750–758. <https://doi.org/10.1016/j.jasms.2004.01.009>.
- (16) Ma, X.; Dagan, S.; Somogyi, Á.; Wysocki, V. H.; Scaraffia, P. Y. Low Mass MS/MS Fragments of Protonated Amino Acids Used for Distinction of Their <sup>13</sup>C- Isotopomers in Metabolic Studies. *J. Am. Soc. Mass Spectrom.* **2013**, *24* (4), 622–631. <https://doi.org/10.1007/s13361-012-0574-9>.
